# Supplementary material
Source: PubMed Central journal article supplement (PMC3033693)

# **Human Cytochrome P450, CYP2S1, Metabolizes Cyclooxygenase – and Lipoxygenase – Derived Eicosanoids**

Peter Bui, Satoshi Imaizumi, Sudheer Reddy Beedanagari, Srinivasa T. Reddy, and Oliver Hankinson

Drug Metabolism & Deposition. Manuscript # 35121

S.Figure 1 A) LC-ESI-MS/MS of 5-HpETE incubated with human CYP2S1. Parent mass [M-H]<sup>-</sup>, 335

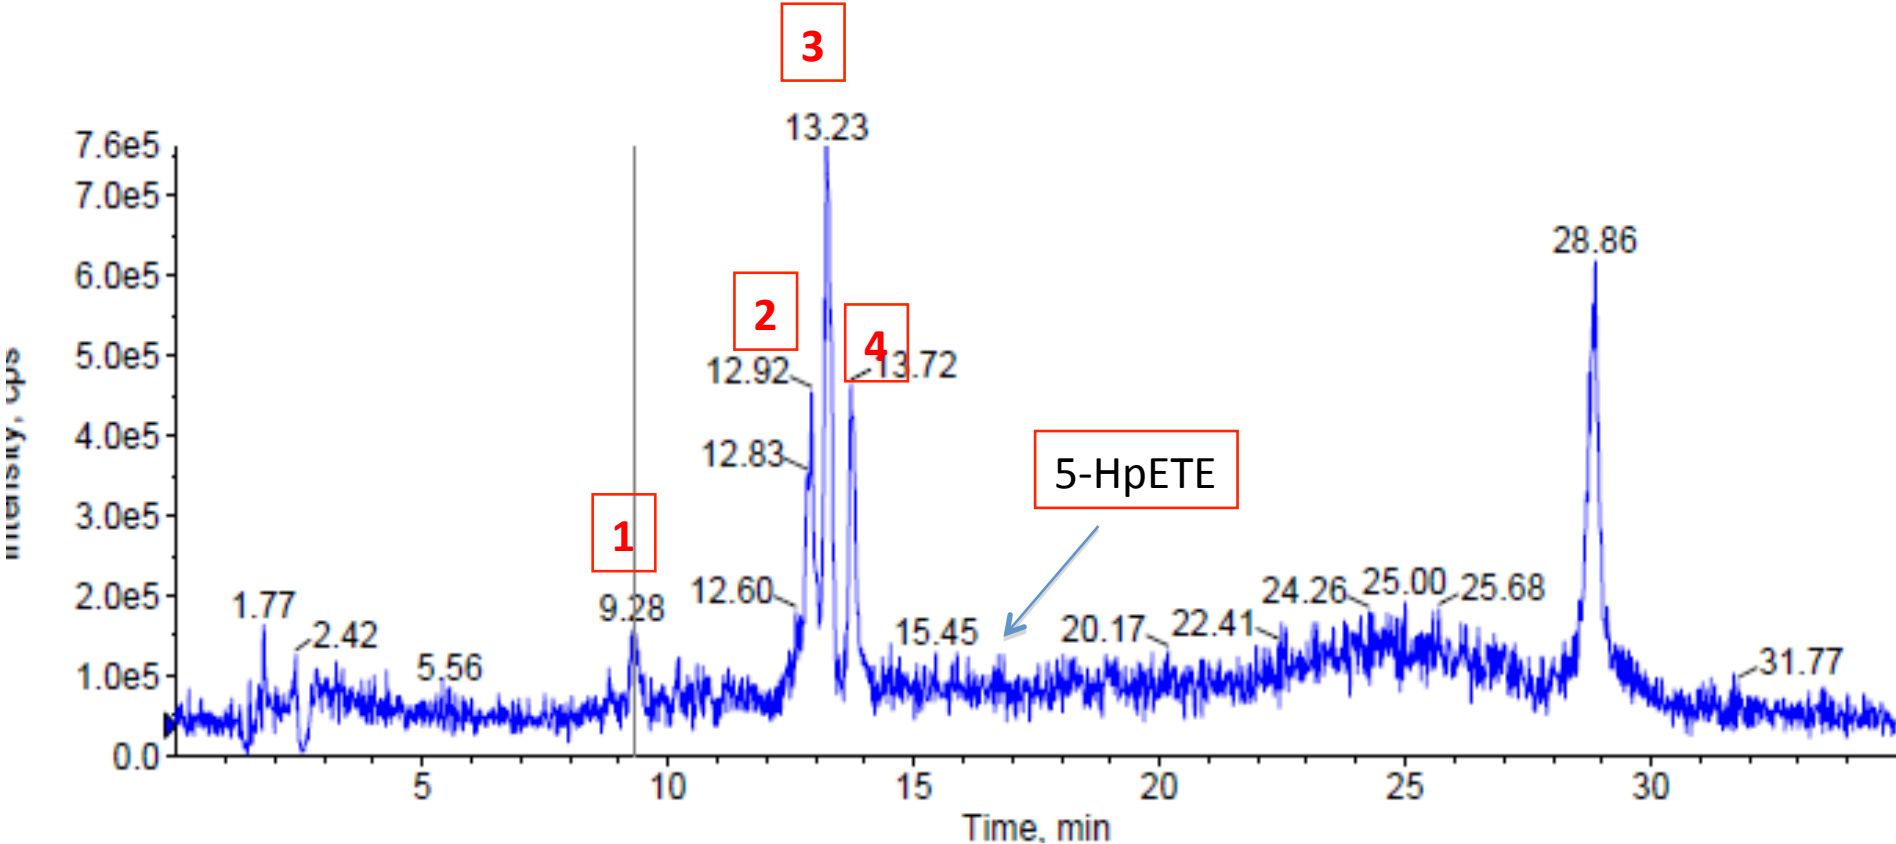

S.Figure 1B) Fragmentation of product 1 = 9.332 min. 9-hydroxy-5,6-epoxy-7,11,14,-eicosatrienoic acid

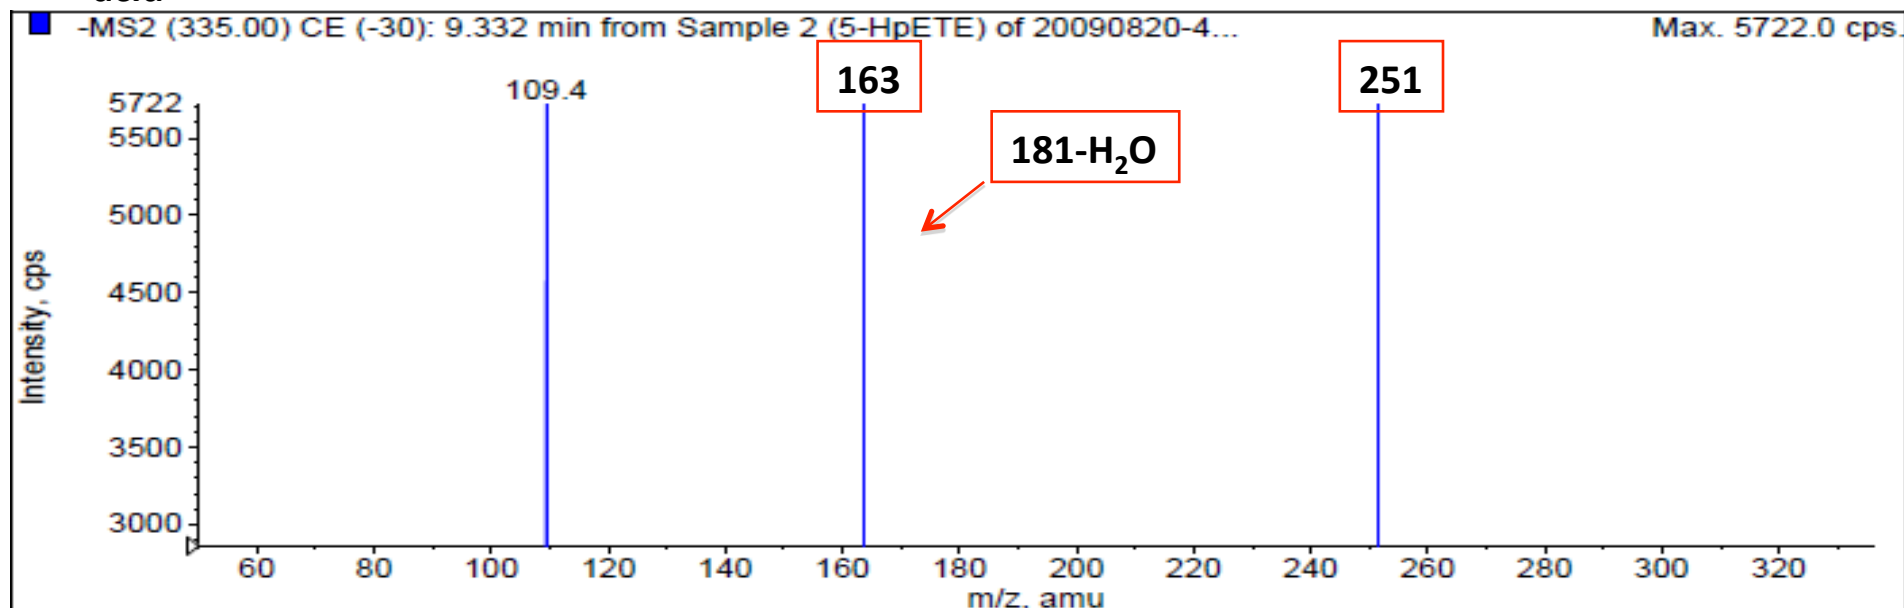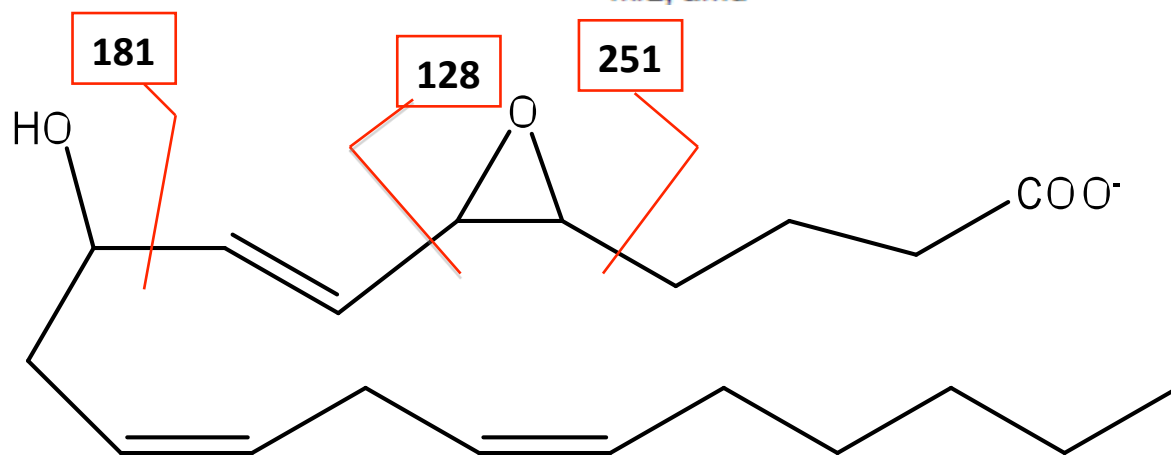

S.Figure 1C) Product 2 = 12.92 min. 9-hydroxy-5,6-epoxy-7,11,14,-eicosatrienoic acid

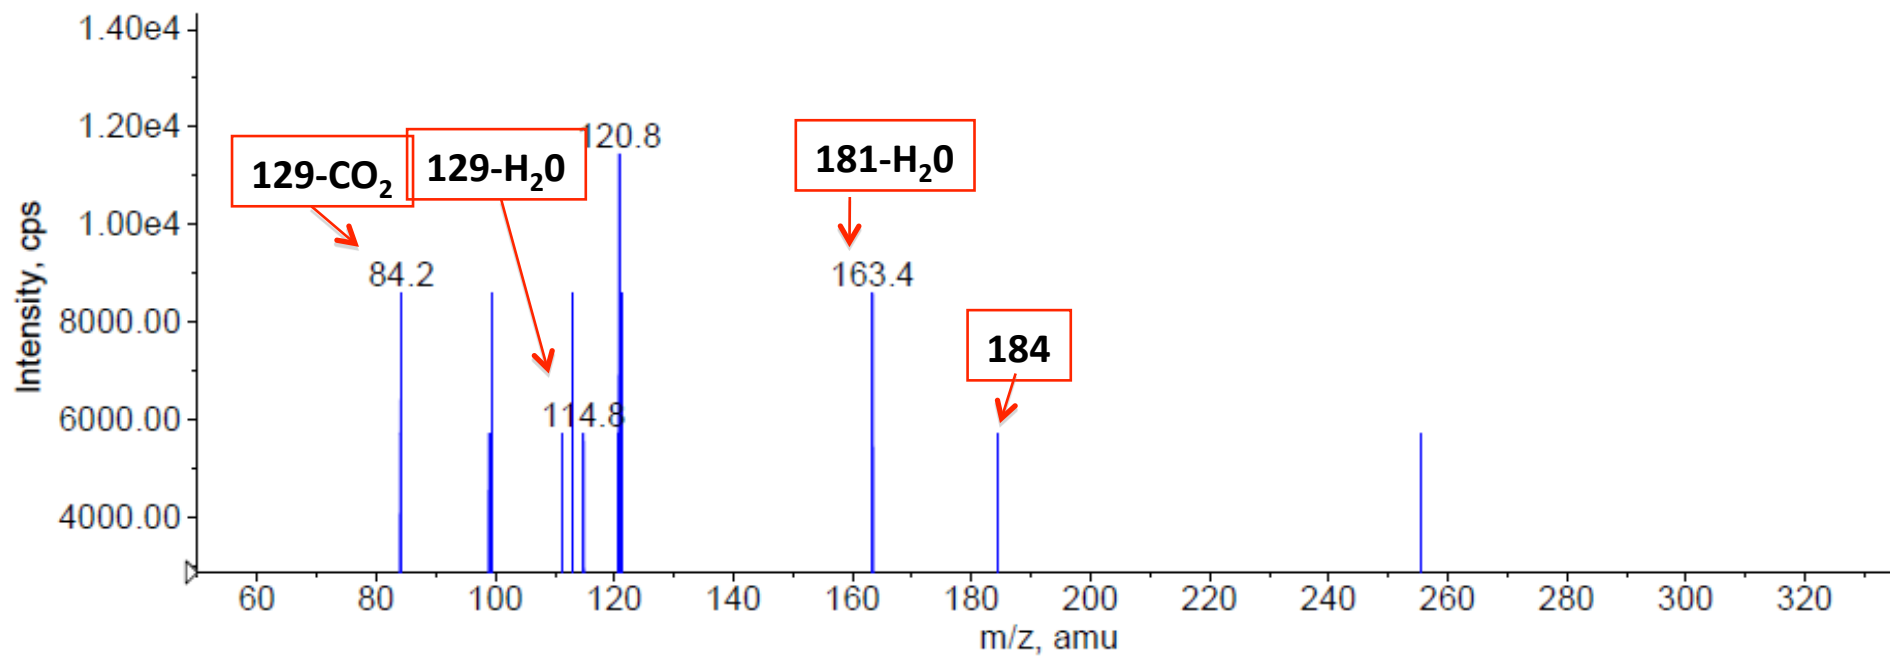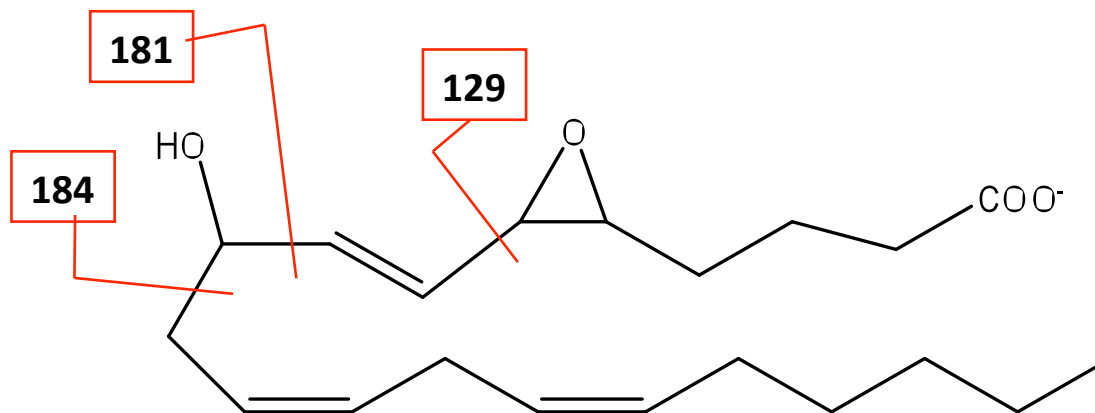

S.Figure 1D) Fragmentation of Product 3 = 13.23 min. 7-hydroxy-5,6-epoxy-8,11,14,-eicosatrienoic acid

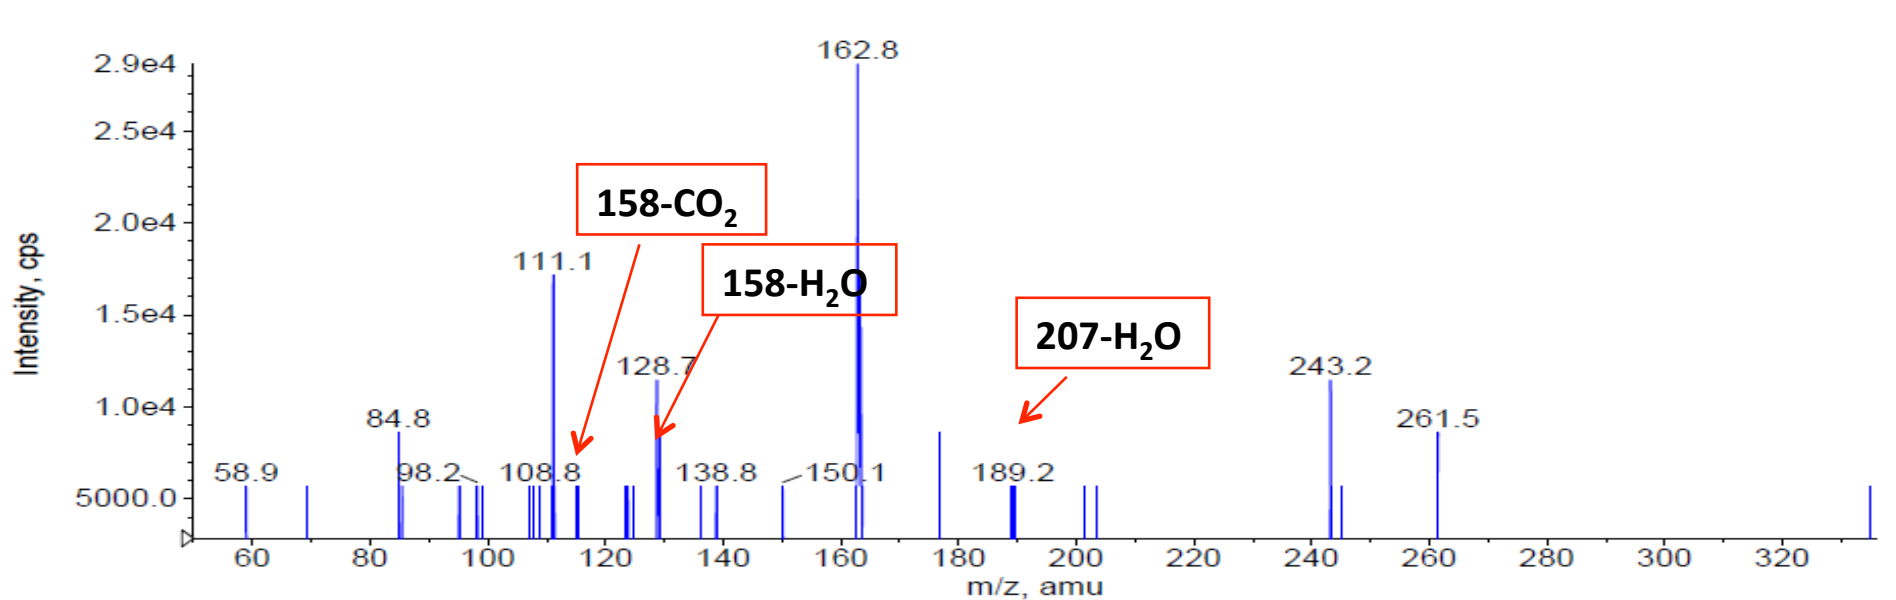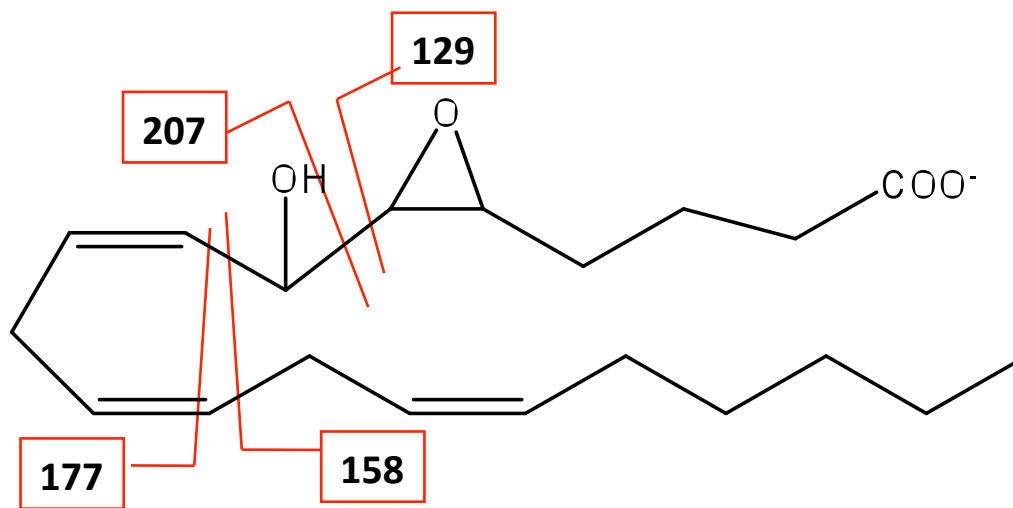

S.Figure 1E) Fragmentation of Product 4 = 13.72 min. 7-hydroxy-5,6-epoxy-8,11,14,-eicosatrienoic acid

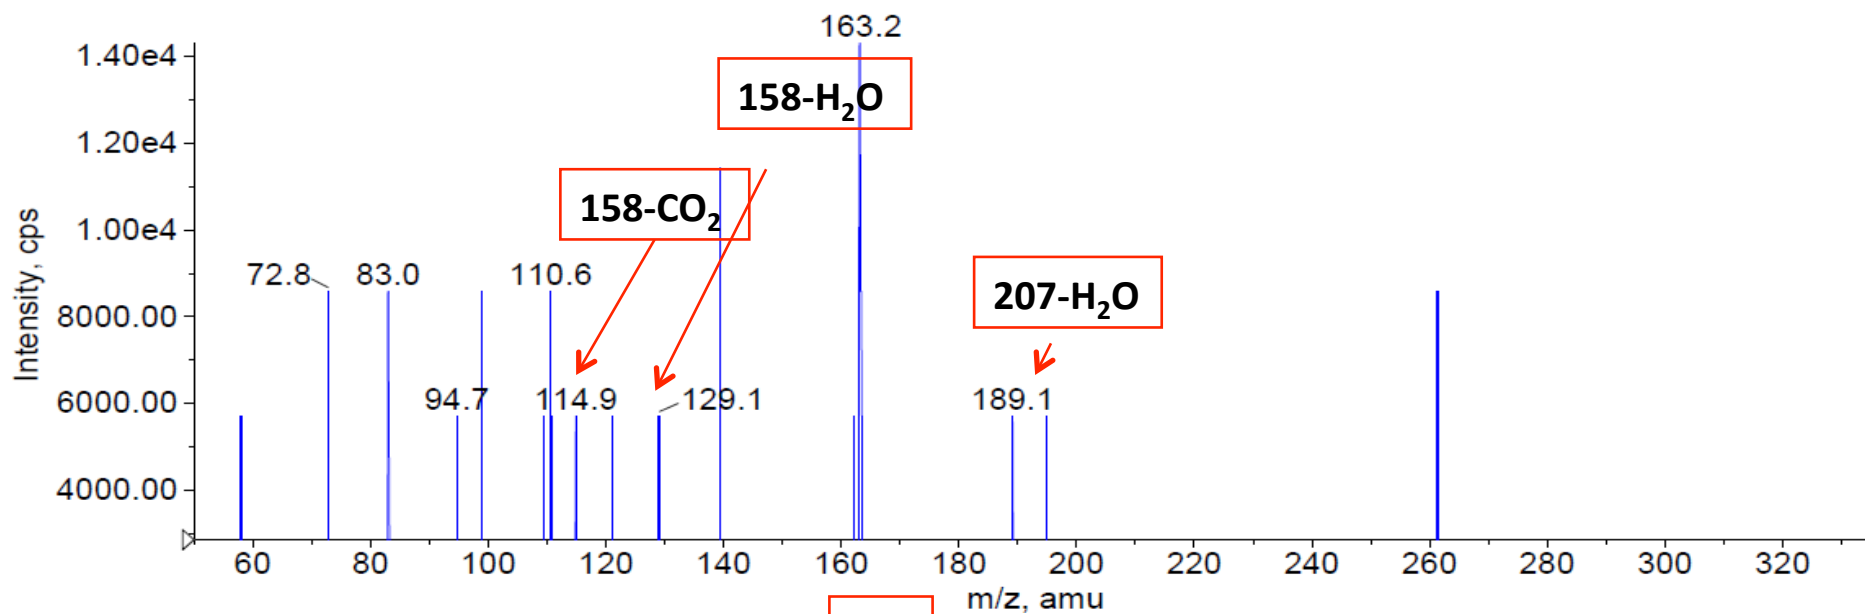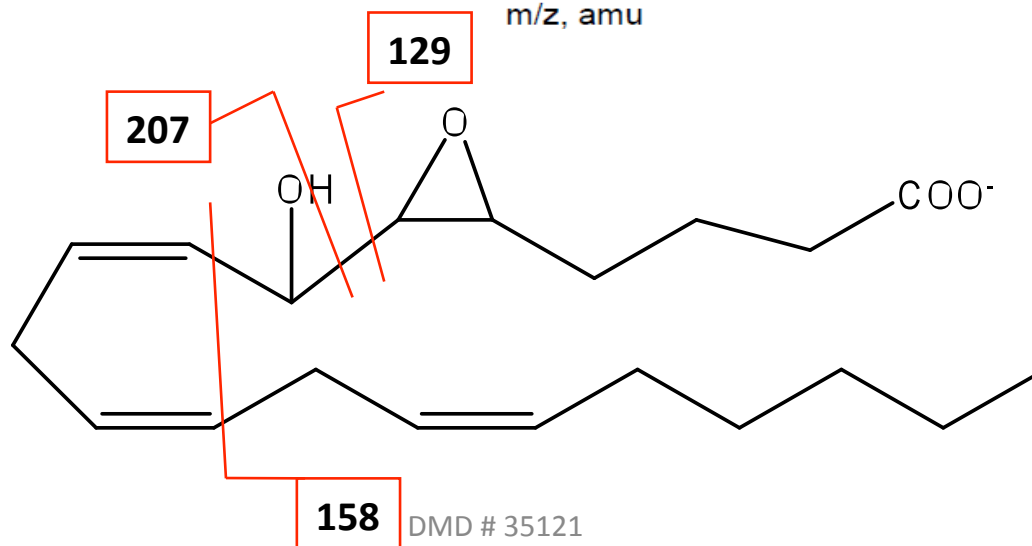

S. Figure 2A) LC-ESI-MS/MS of 12-HpETE incubated with human CYP2S1. Parent mass [M-H]<sup>-</sup>, 335

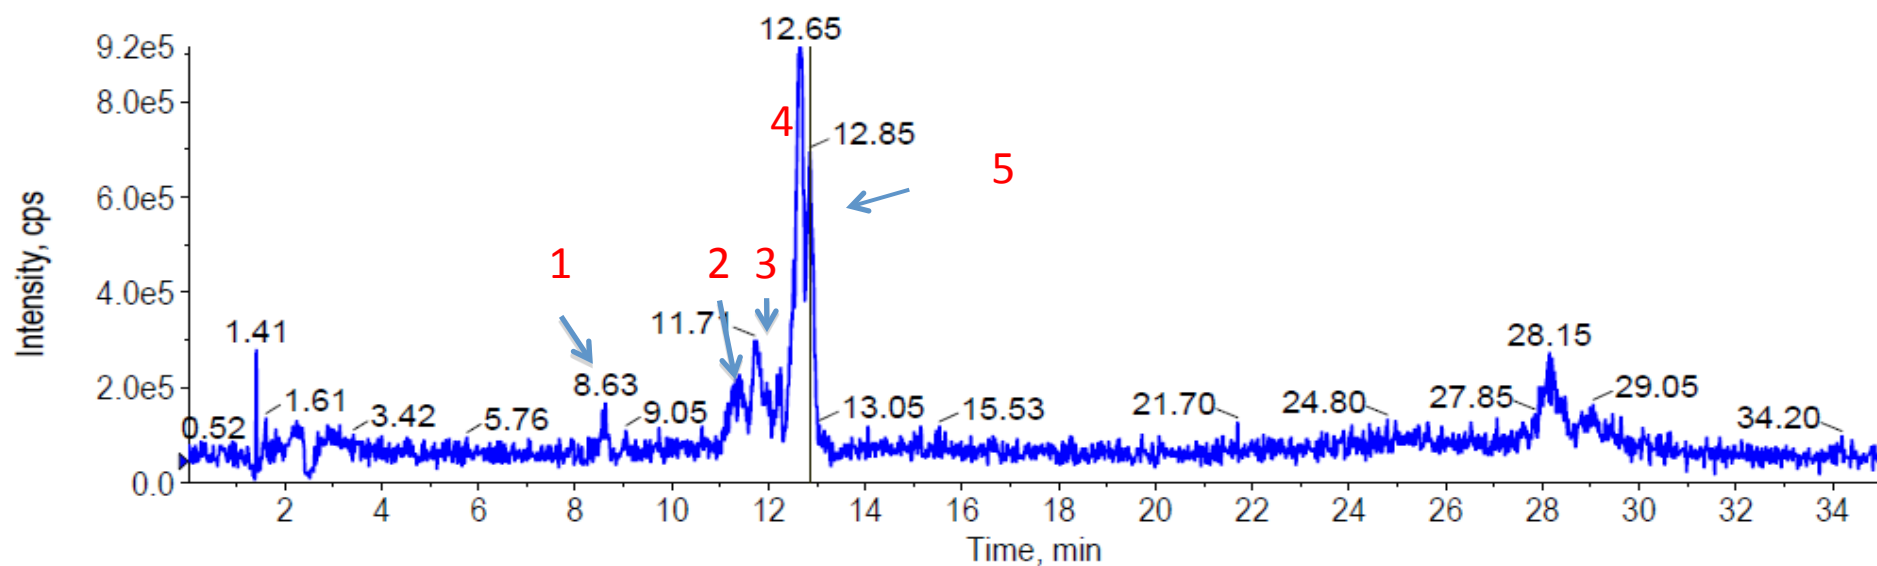

S.Figure 2B) Product 1= 8.63 min. 8-hydroxy-11,12-epoxy-5,8,14-ecosatrienoic acid, Hepoxilin A<sub>3</sub>

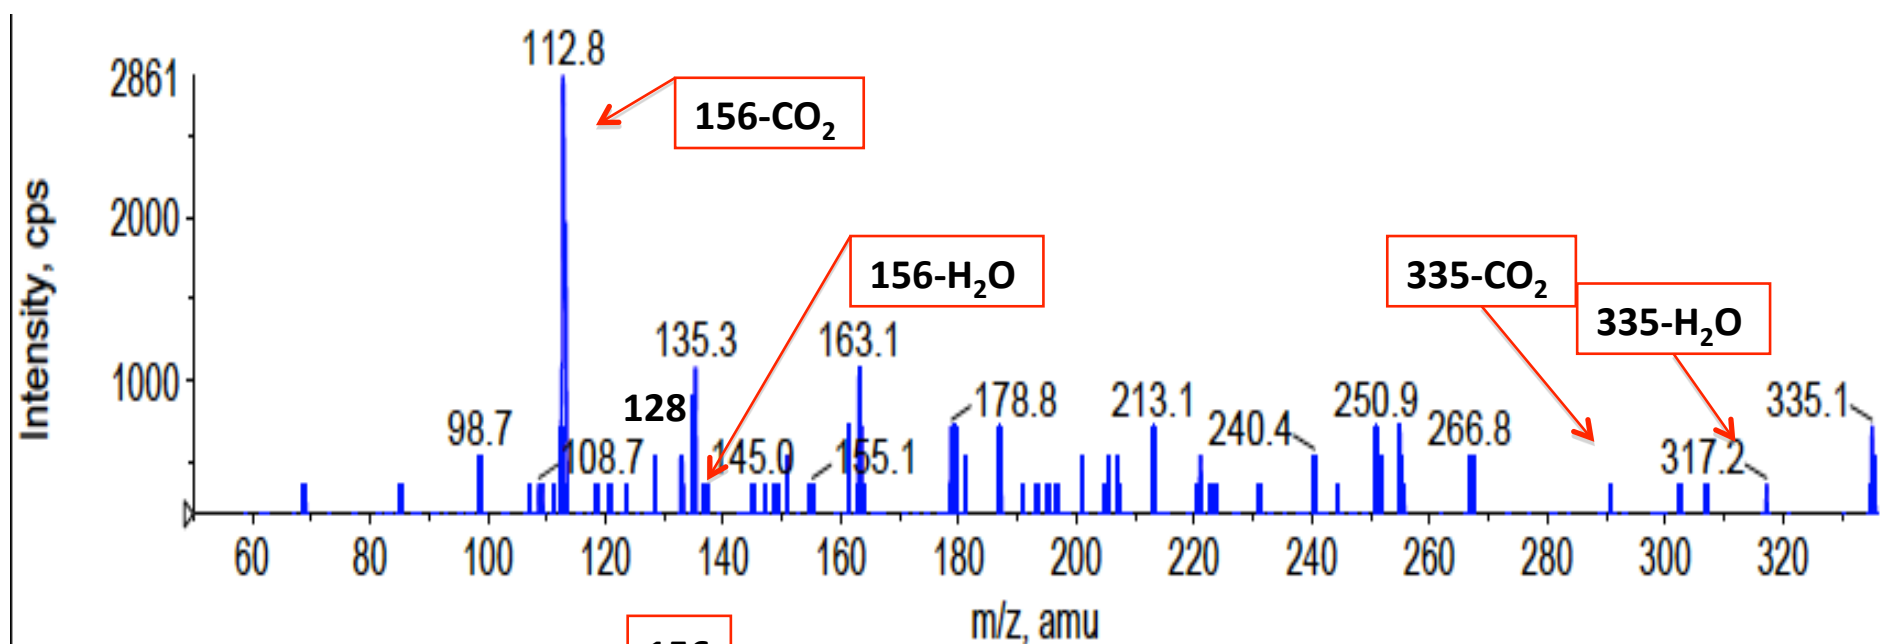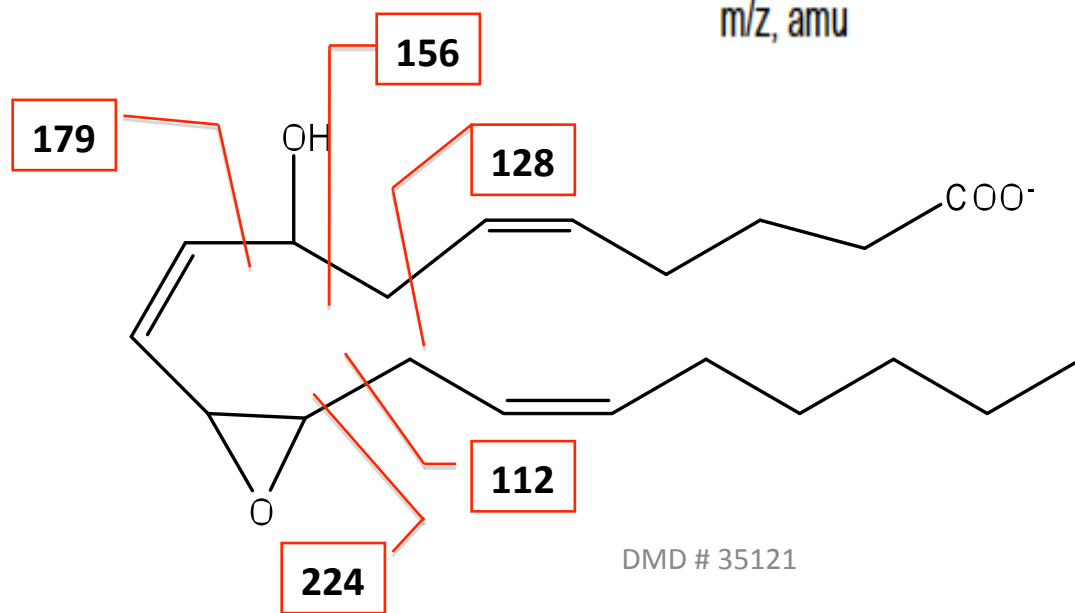



S.Figure 2C) Product 2 = 11.39 min. 8-hydroxy-11,12-epoxy-5,8,14-ecosatrienoic acid, Hepoxilin A<sub>3</sub>

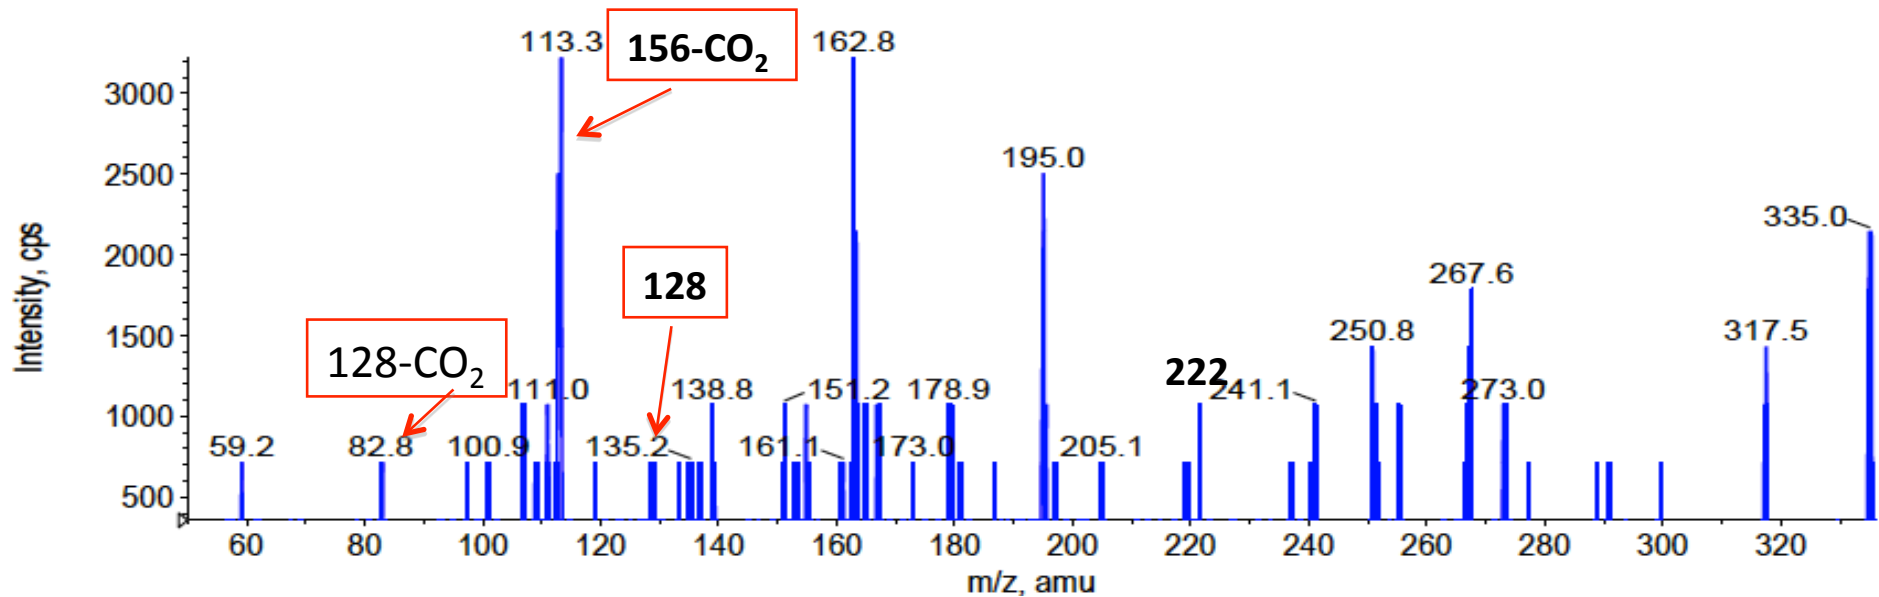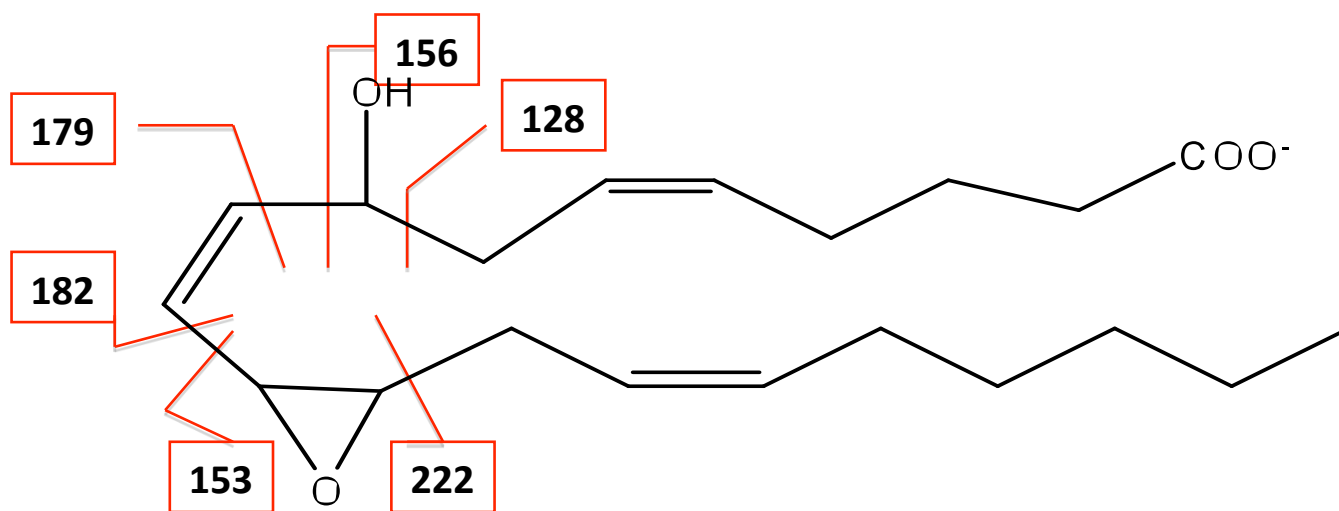

DMD # 35121

S.Figure 2D) Fragmentation of product 3 = 11.7 min. 8-hydroxy-11,12-epoxy-5,8,14-ecosatrienoic acid, Hepoxilin A<sub>3</sub>

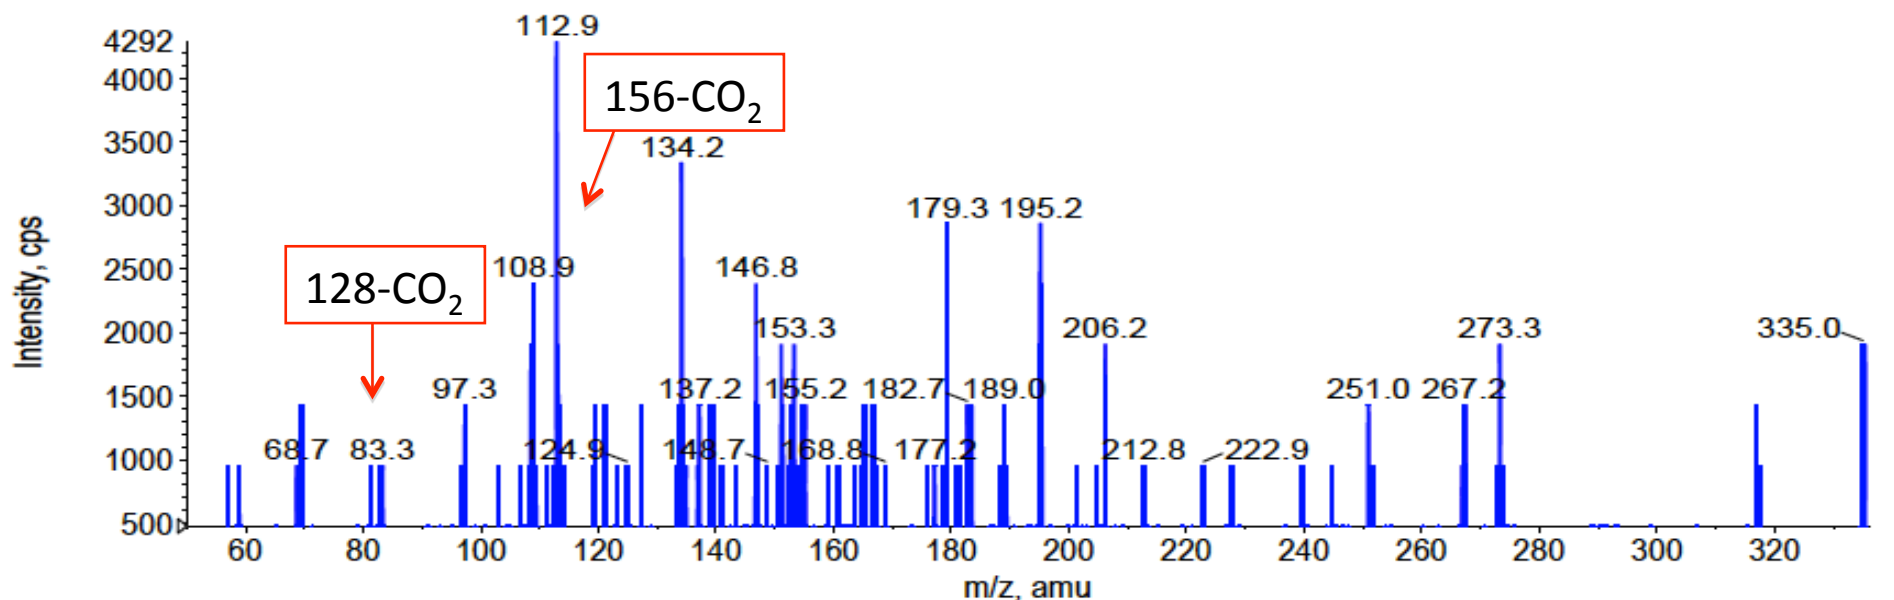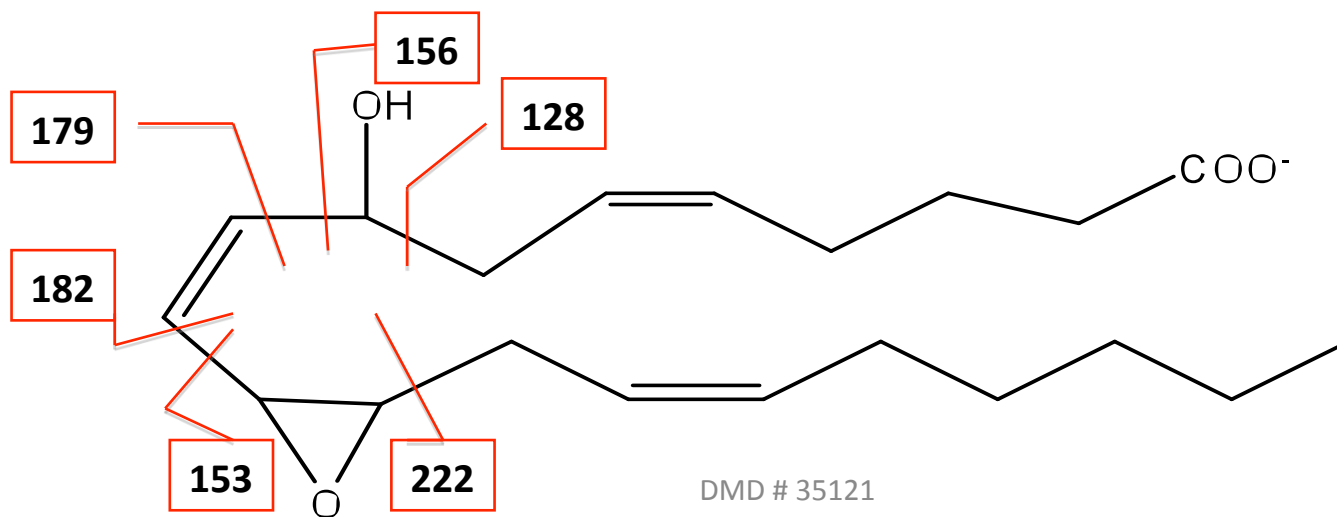

S.Figure 2E) Fragmentation of product 4 = 12.65 min. 8-hydroxy-11,12-epoxy-5,8,14-ecosatrienoic acid, Hepoxilin A<sub>3</sub>

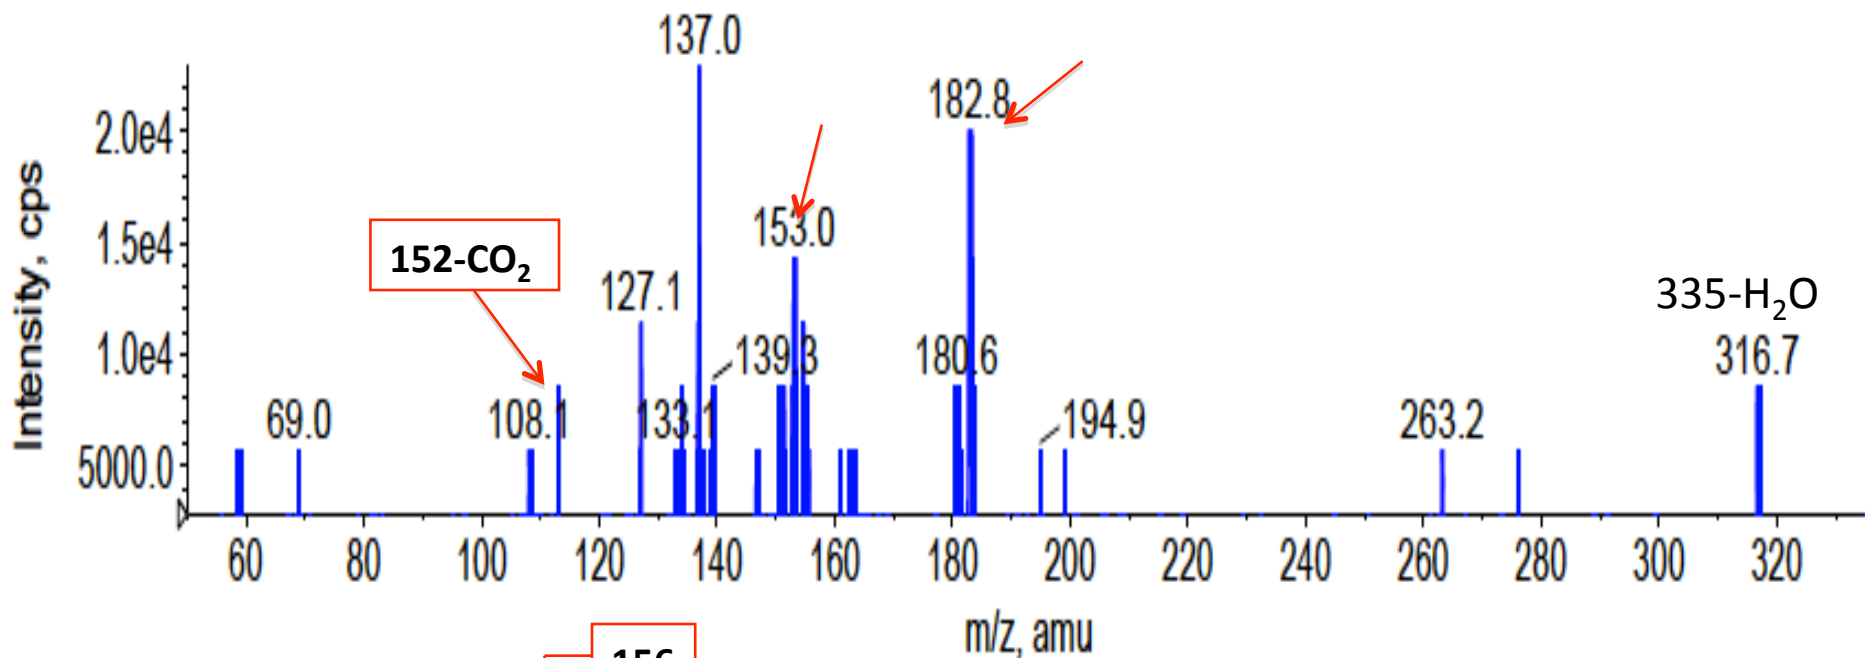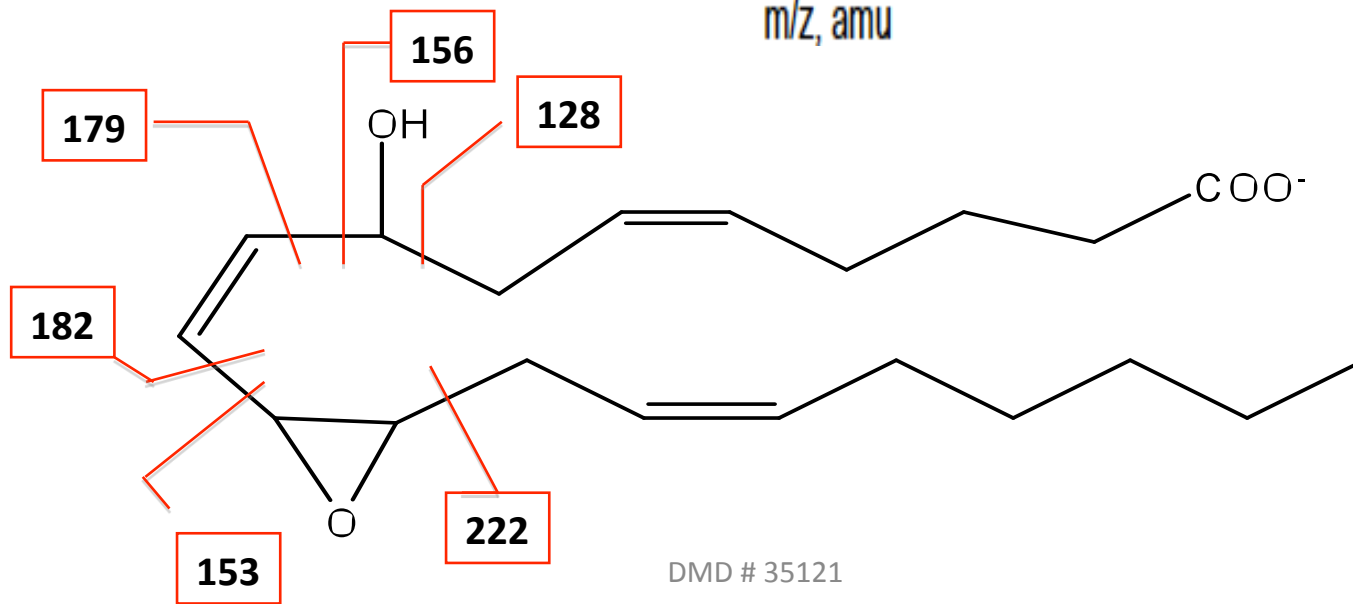

S.Figure 2F) Fragmentation of product 5 = 12.85 min. 10-hydroxy-11,12-epoxy-5,8,14-ecosatrienoic acid), Hepoxilin B<sub>3</sub>

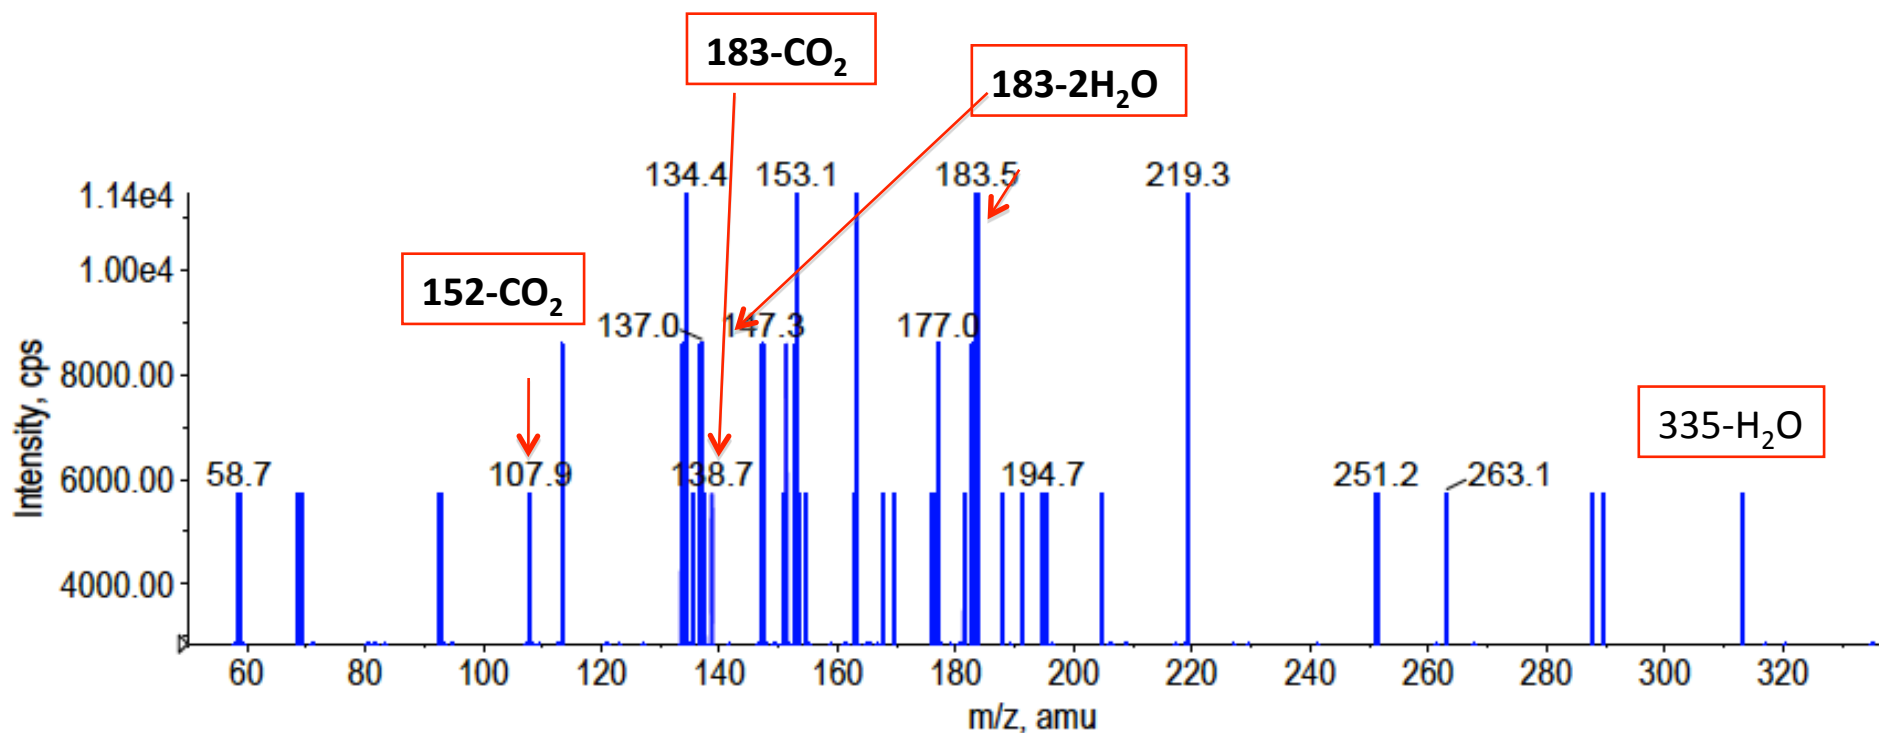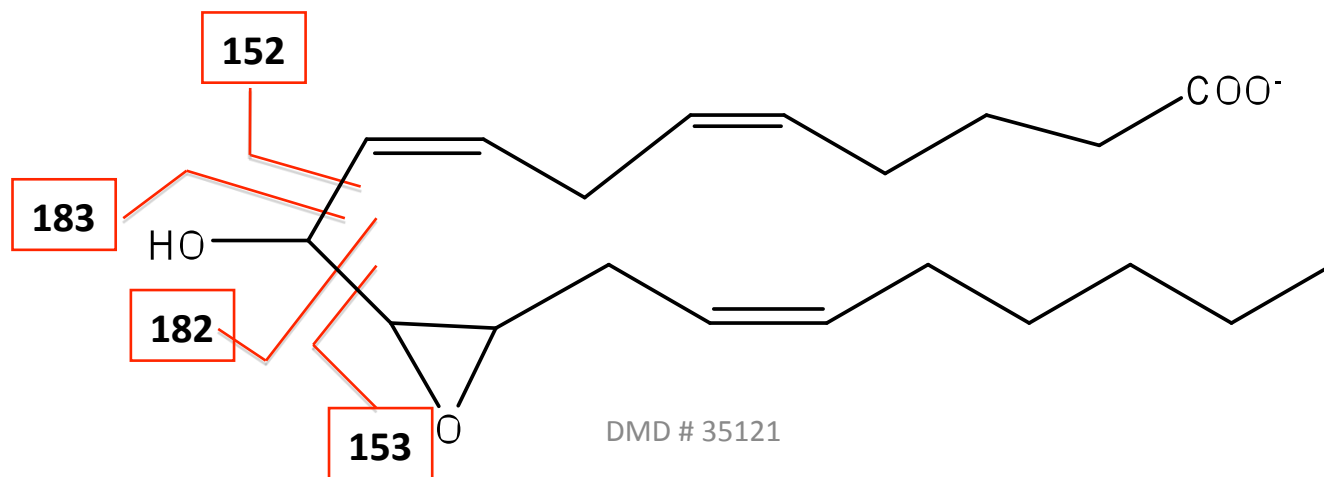

S.Figure 3A) LC-ESI-MS/MS of 15-HpETE incubated with human CYP2S1. Parent mass [M-H]<sup>-</sup>, 335

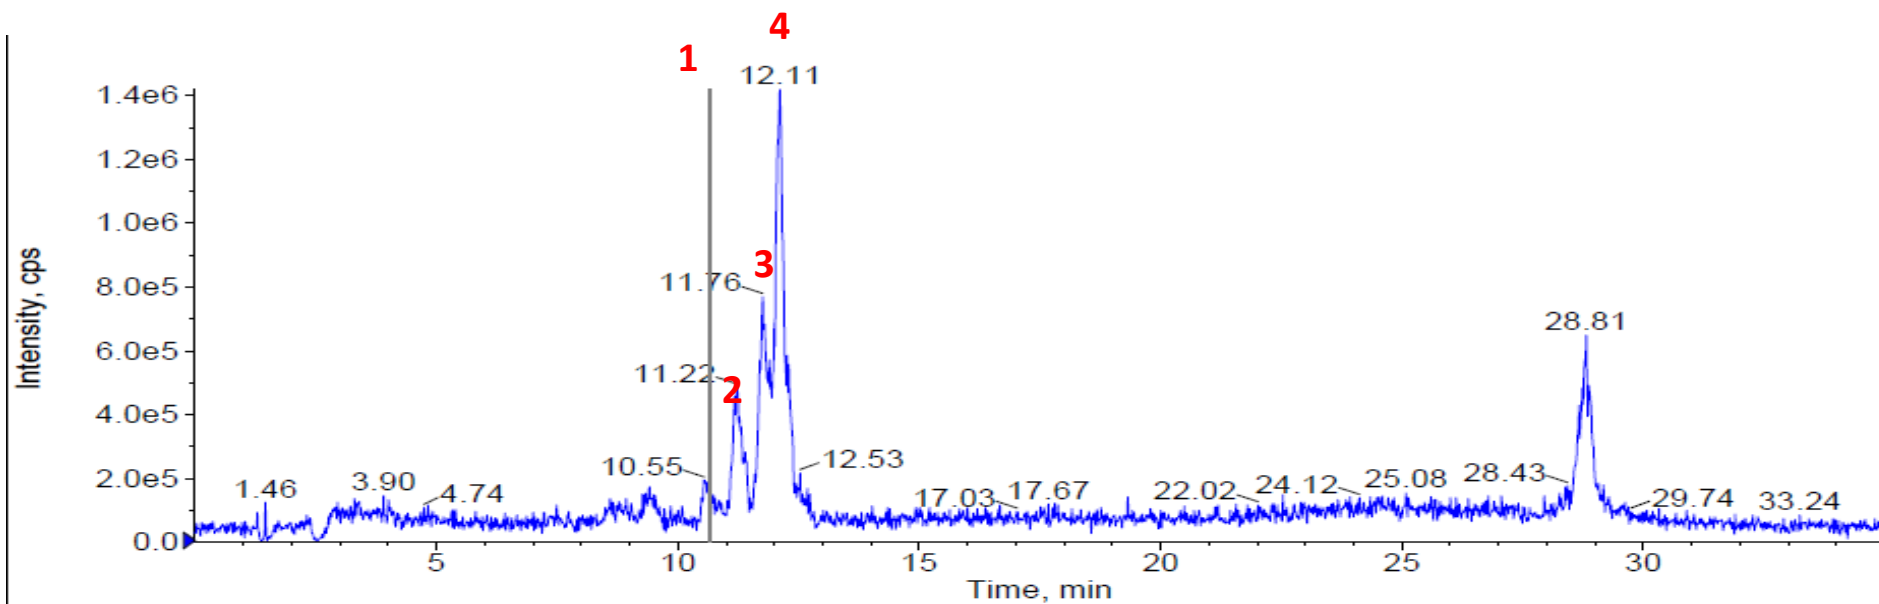

S.Figure 3B) Fragmentation of product 1 = 10.55 min. 11-hydroxy-14.15-epoxy-5,8,12,-eicosatrienoic acid

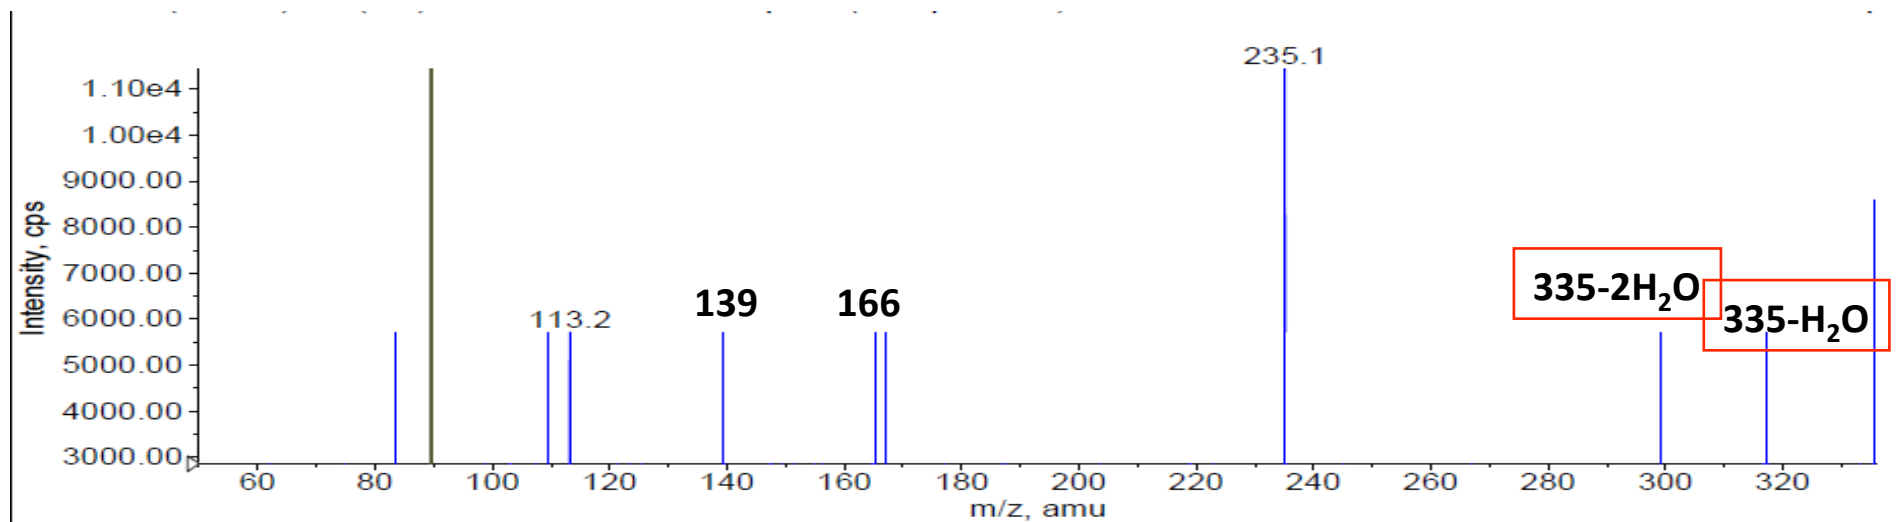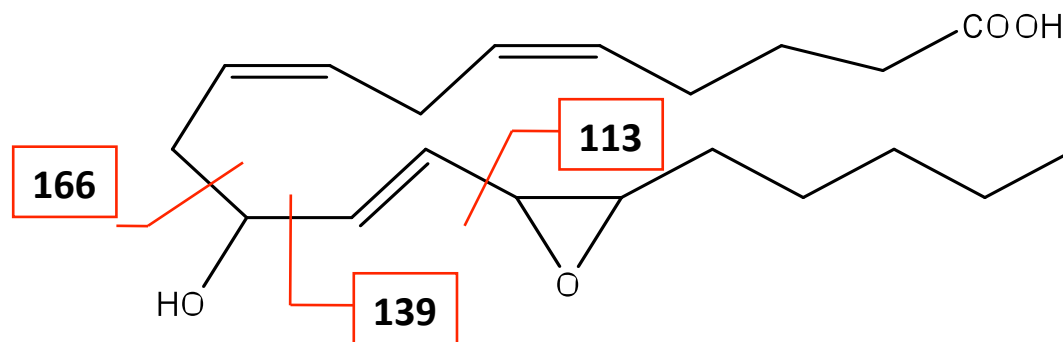

S.Figure 3C) Fragmentation of Product 2: 11.22 min. 11-hydroxy-14.15-epoxy-5,8,12,-eicosatrienoic acid

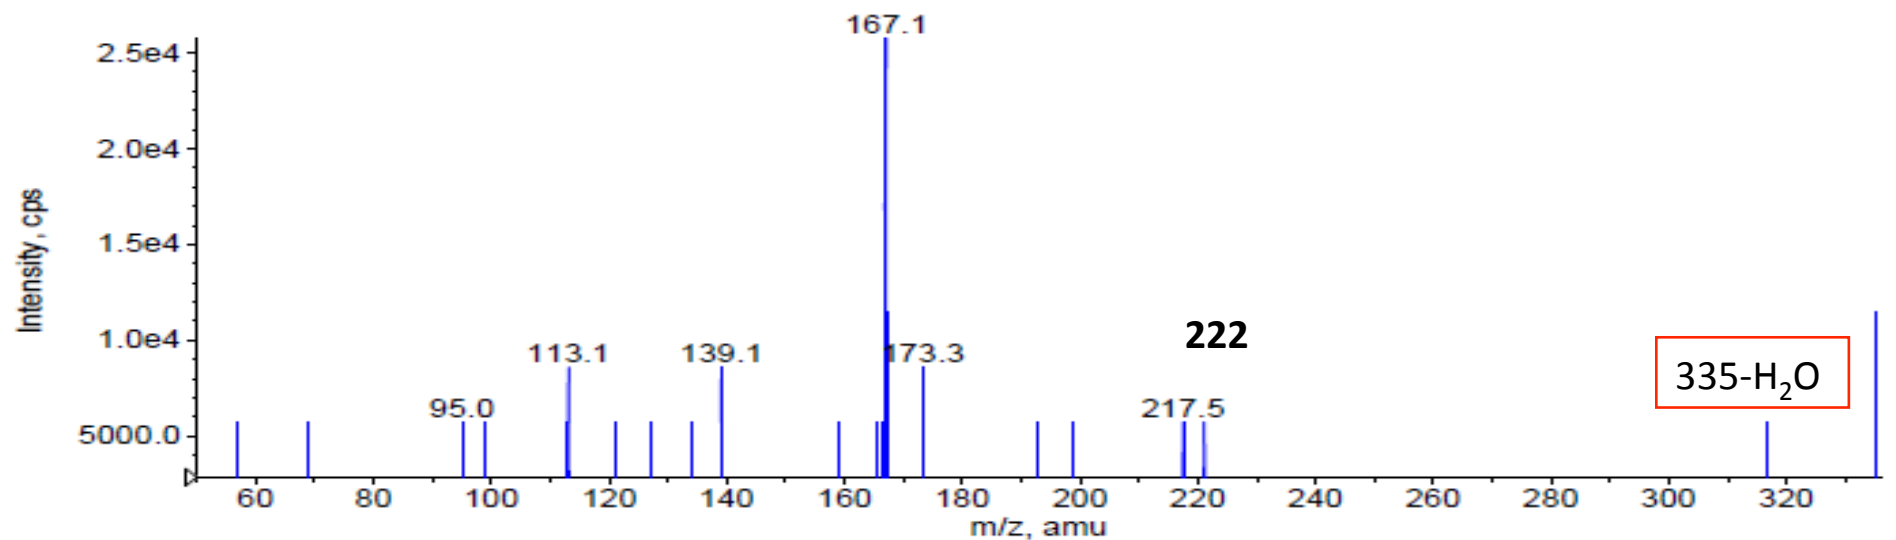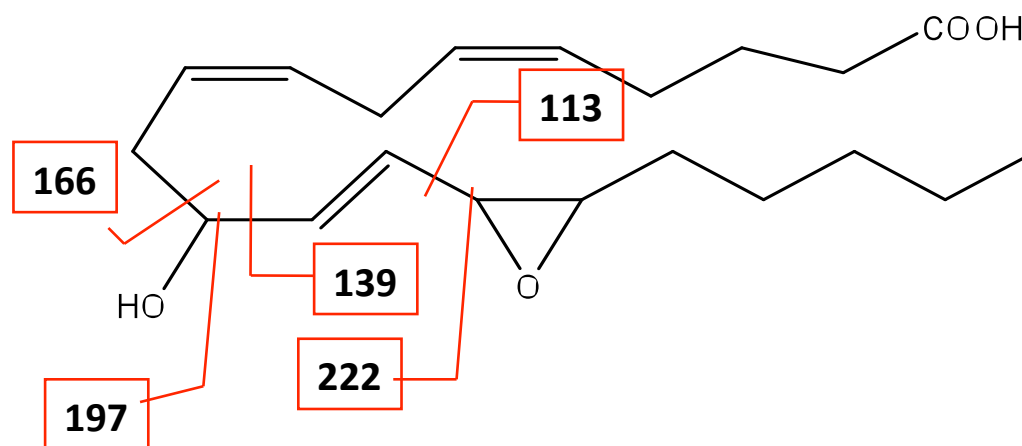

DMD # 35121

S.Figure 3D) Fragmentation of product 3 = 11.76 min. 11-hydroxy-14,15-epoxy-5,8,12,-eicosatrienoic acid

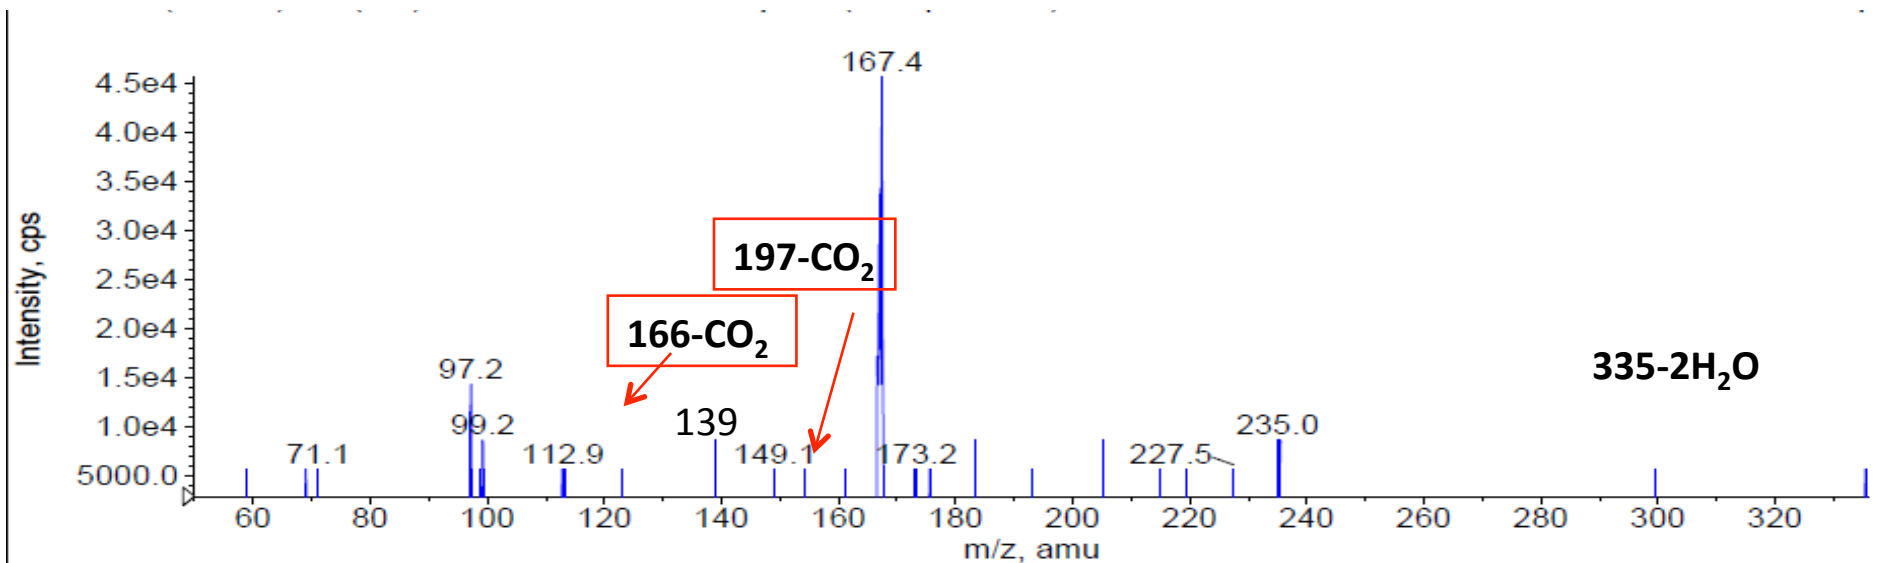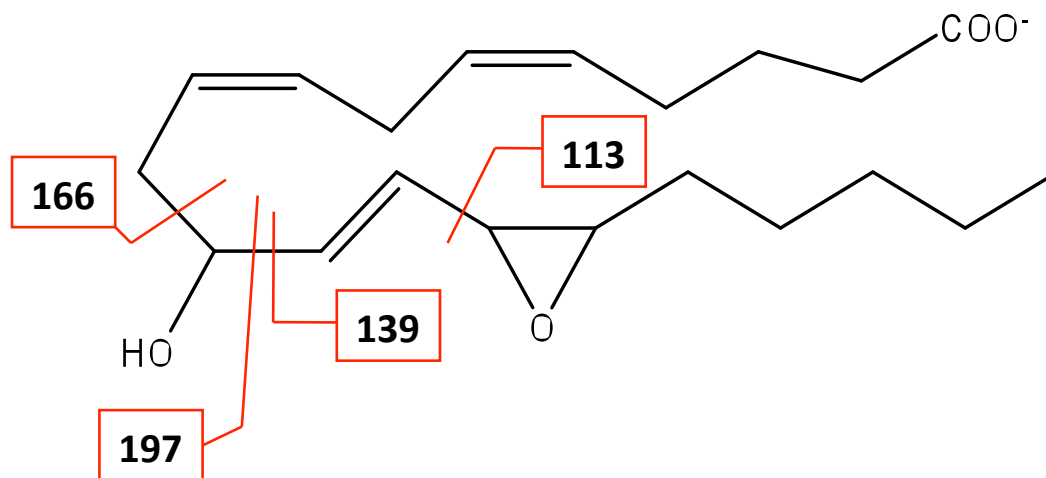

DMD # 35121



S.Figure 3E) Fragmentation of product 4 = 12.11 min. 13-hydroxy-14.15-epoxy-5,8,11,-eicosatrienoic acid

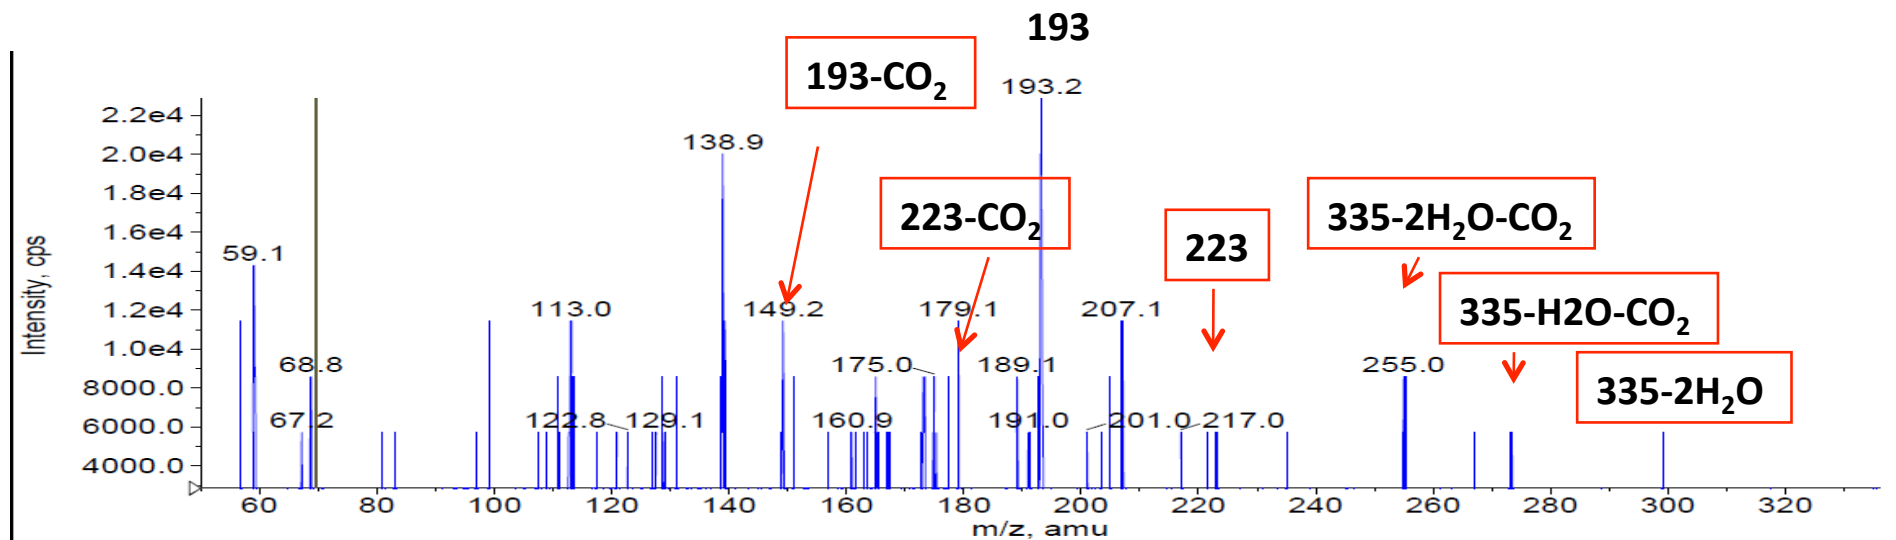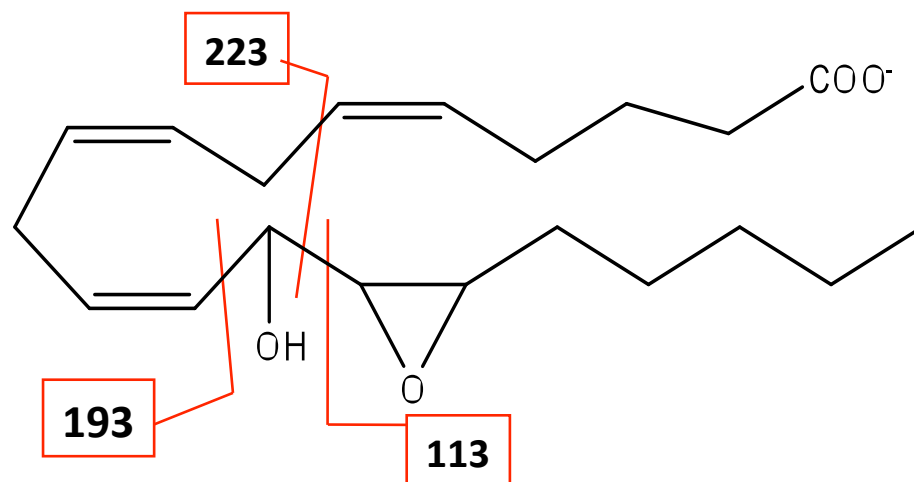

DMD # 35121

S.Figure 4A) LC-ESI-MS/MS of 13-HpODE incubated with human CYP2S1. Parent mass [M-H]<sup>-</sup>, 311

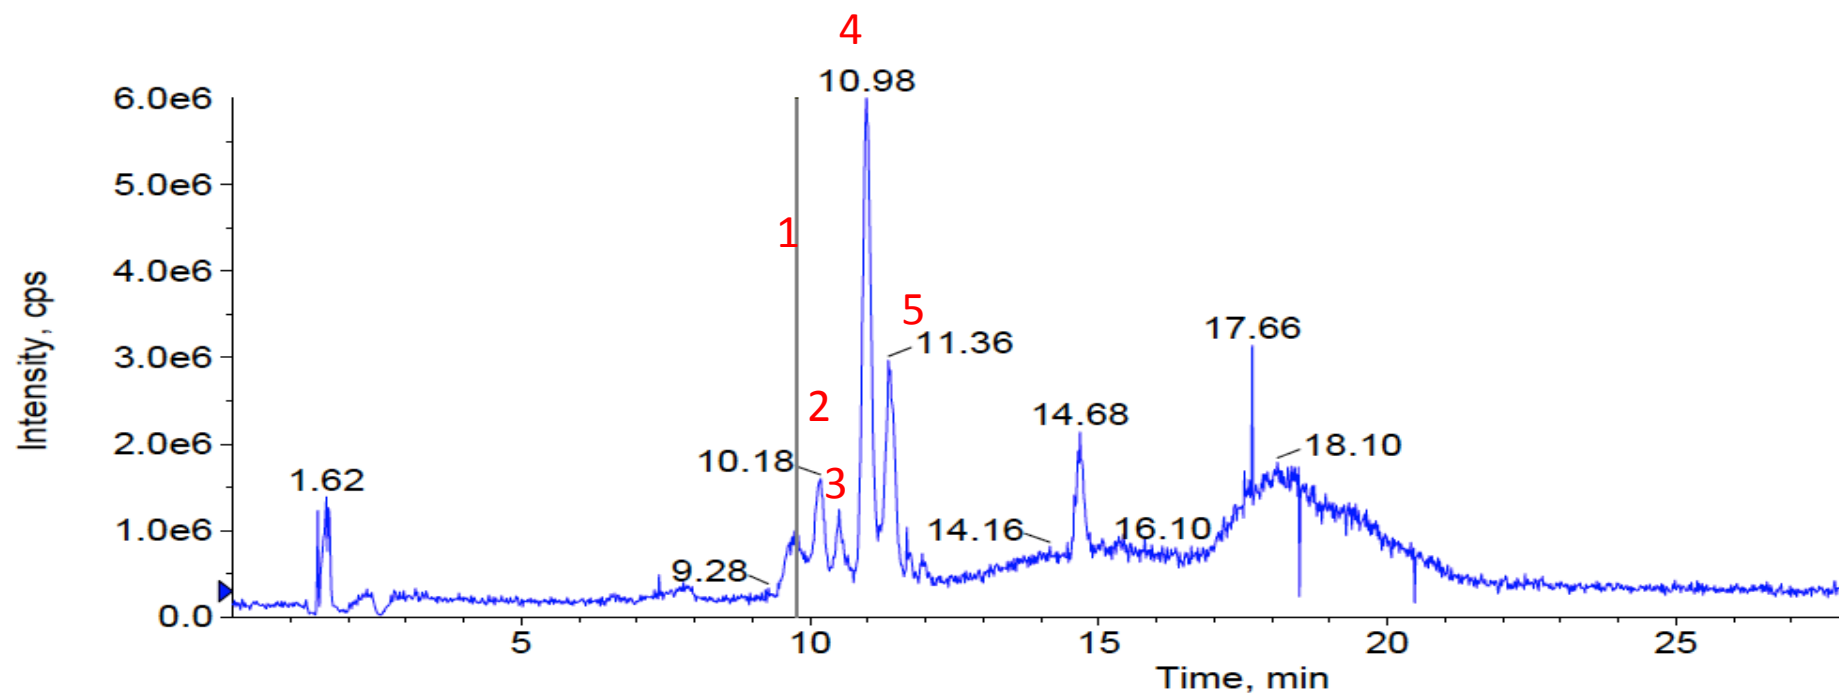

**S.Figure 4B) Fragmentation of product 1 = 9.77 min. 9-hydroxy-12,13-epoxy-10-octadecenoic acid**

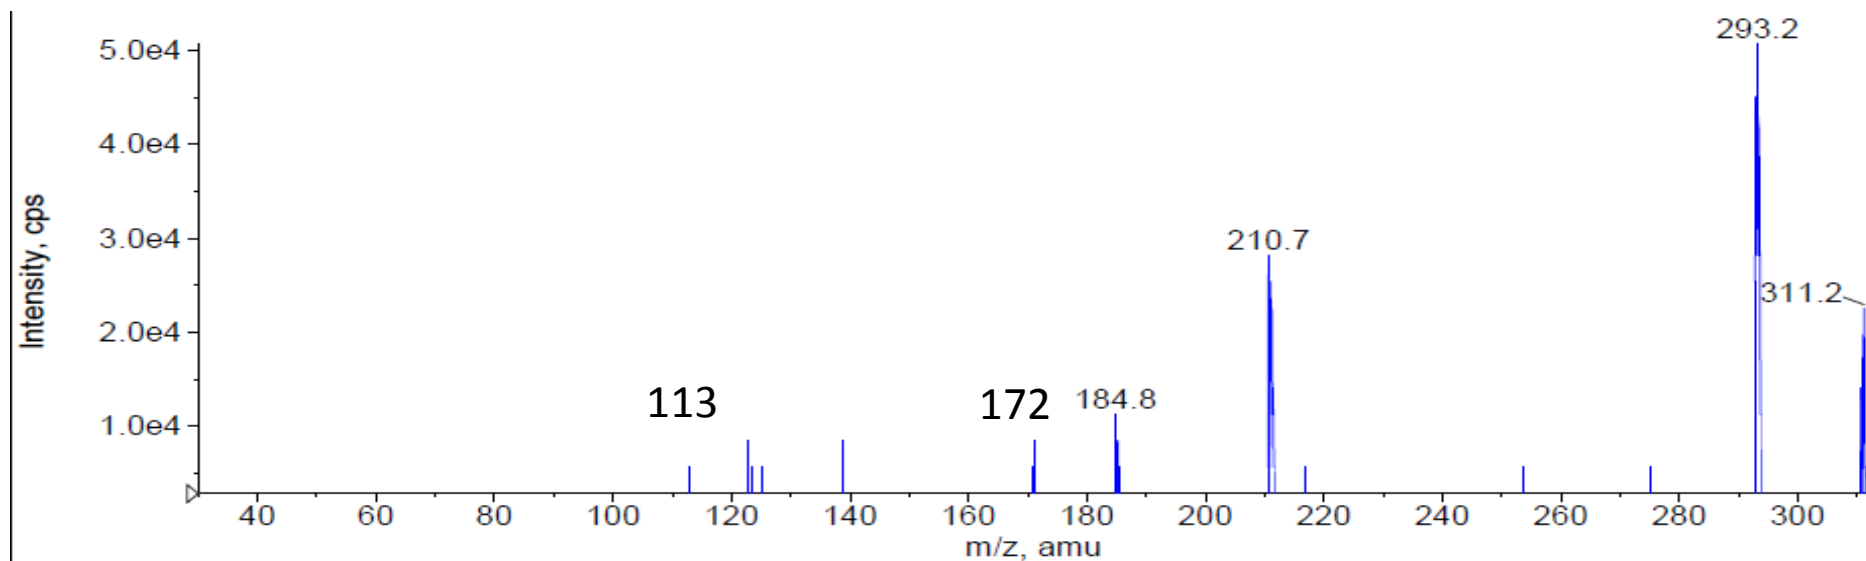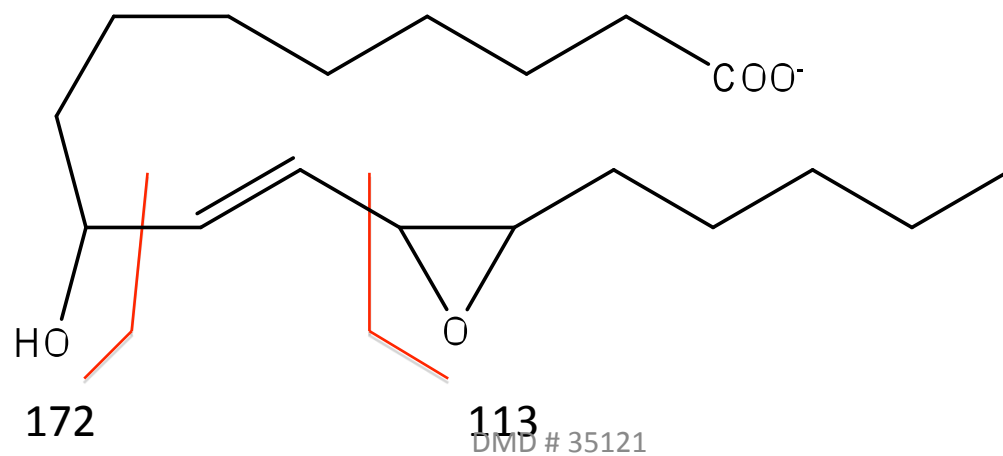

S.Figure 4C) Fragmentation of product 2 = 10.18 min. 9-hydroxy-12,13-epoxy-10-octadecenoic acid

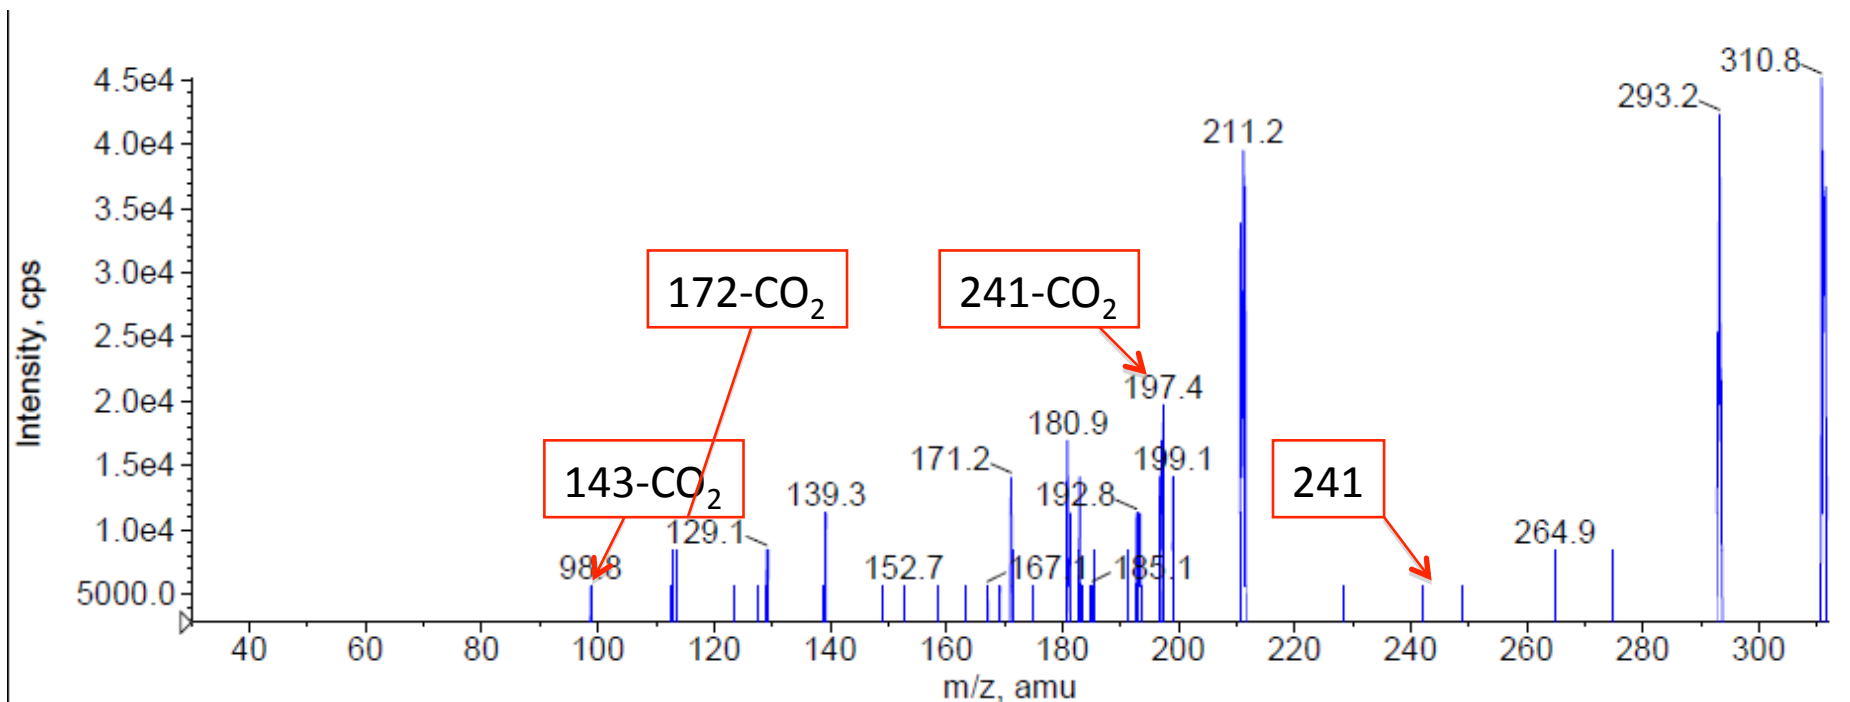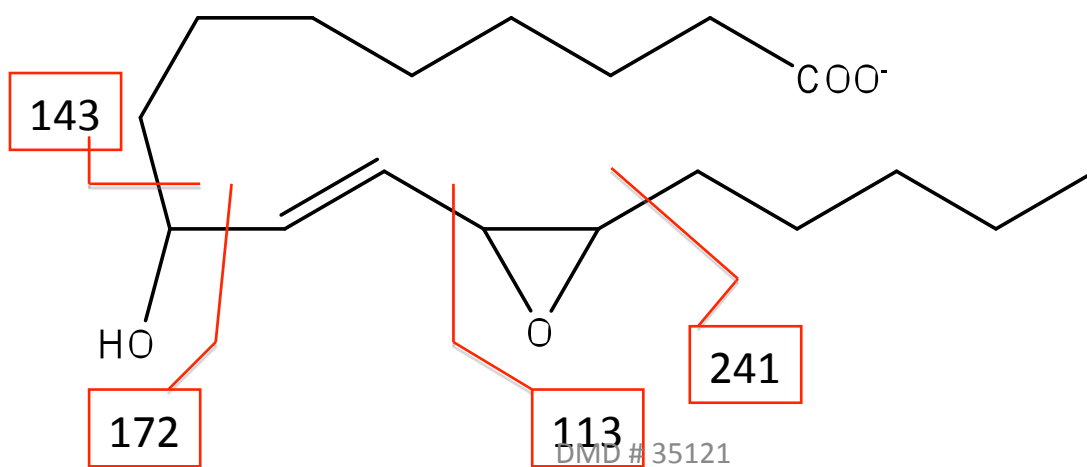

Figure 4D) Fragmentation of product 3 = 10.55 min. 9-hydroxy-12,13-epoxy-10-octadecenoic acid

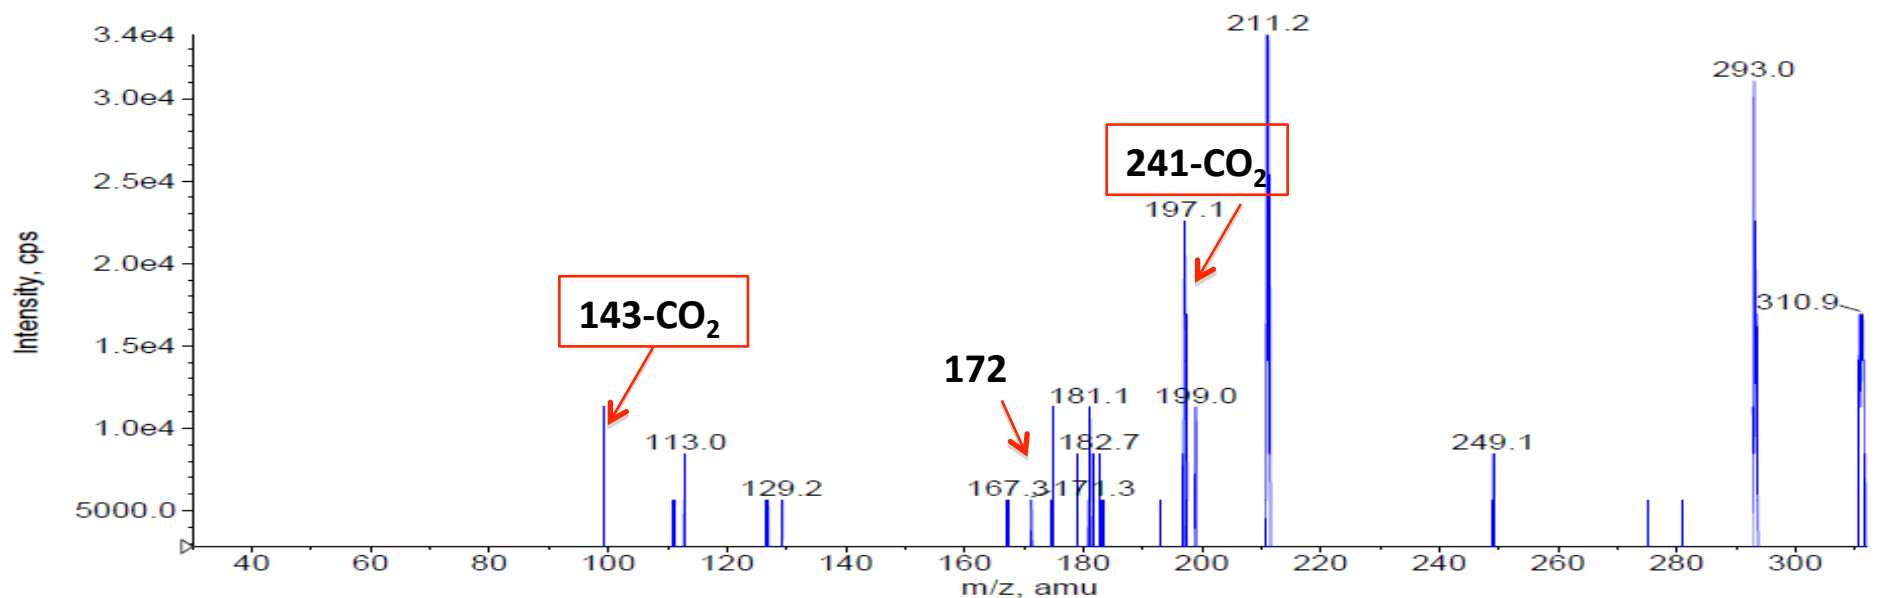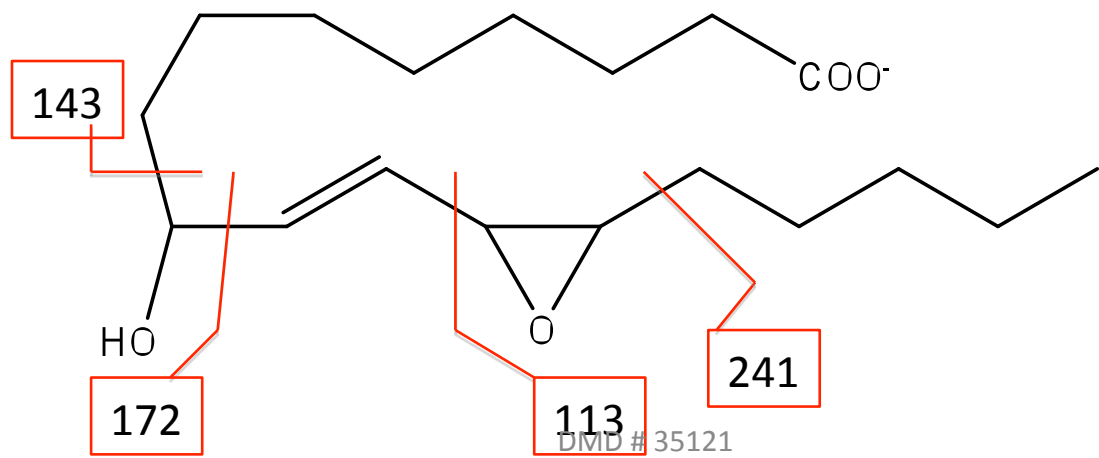

**Figure 4E) Fragmentation of product 4 = 10.99 min. 11-hydroxy-12,13-epoxy-9-octadecenoic acid**

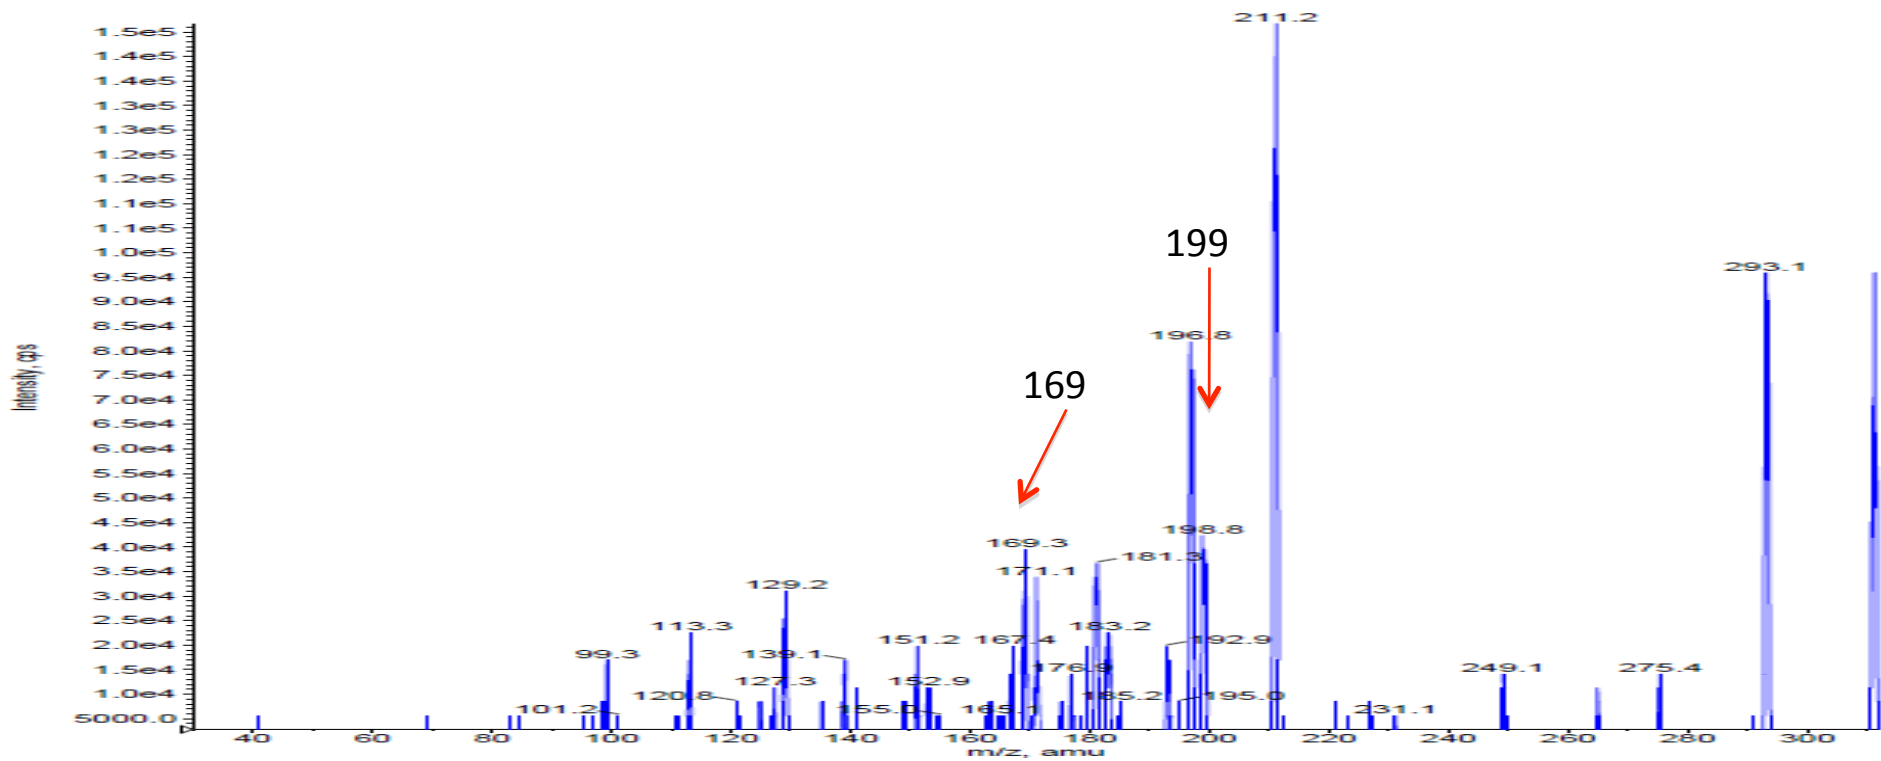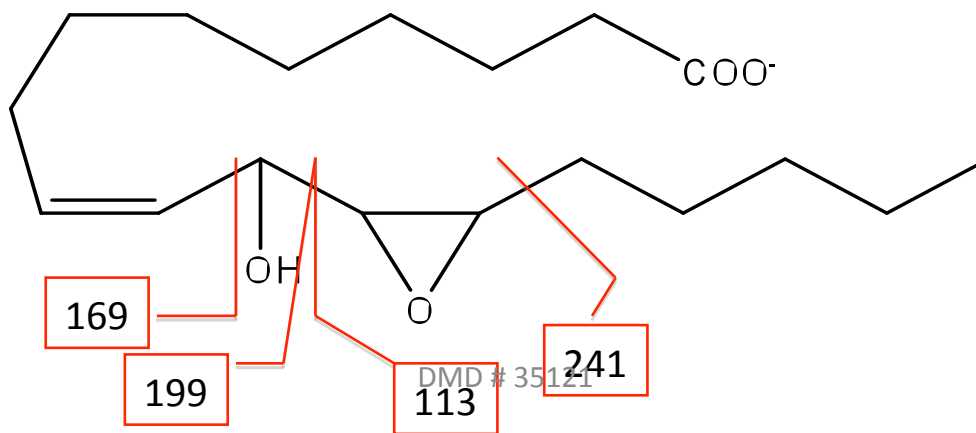

### S.Figure 4F) Fragmentation of product 5 = 11.36 min. 11-hydroxy-12,13-epoxy-9-octadecenoic acid

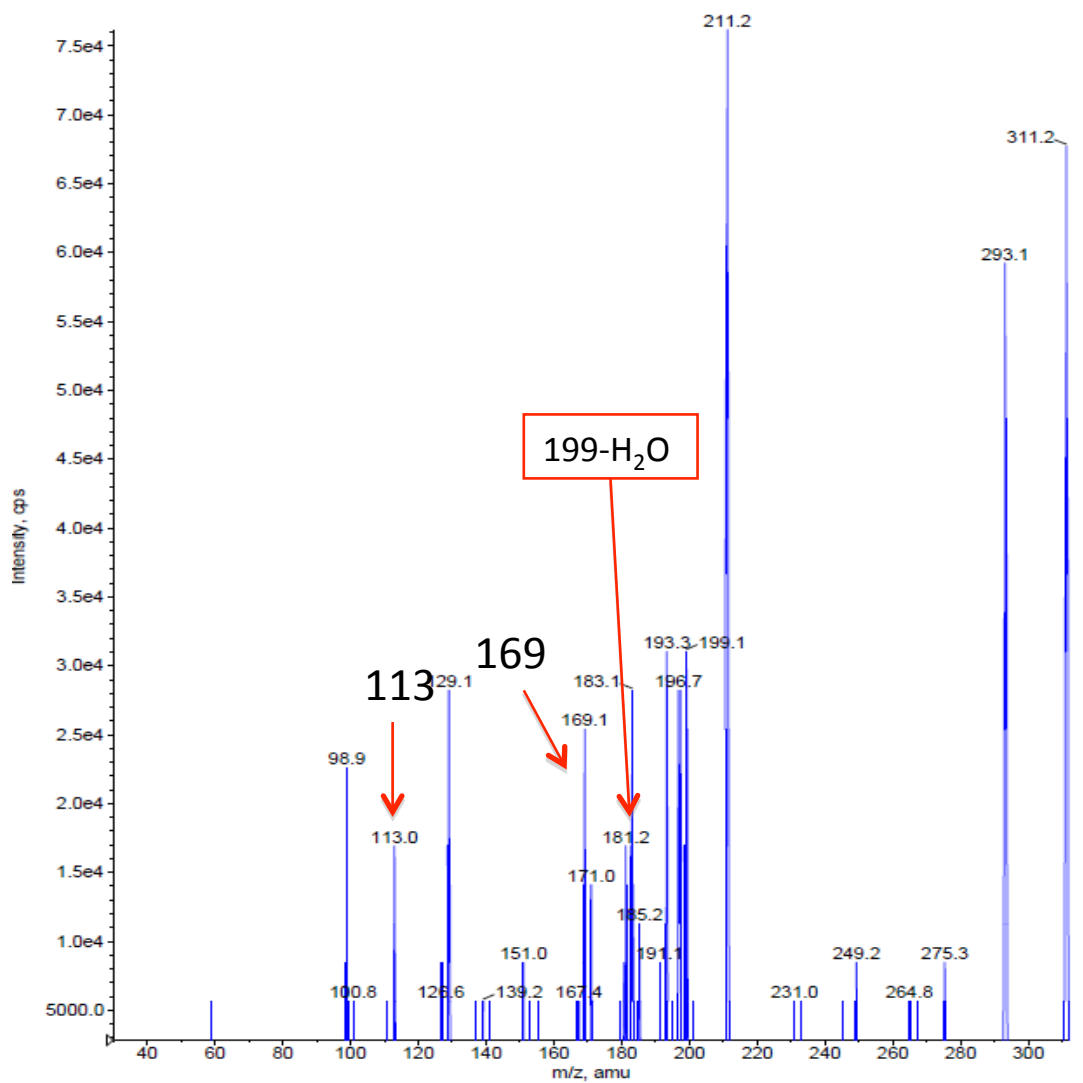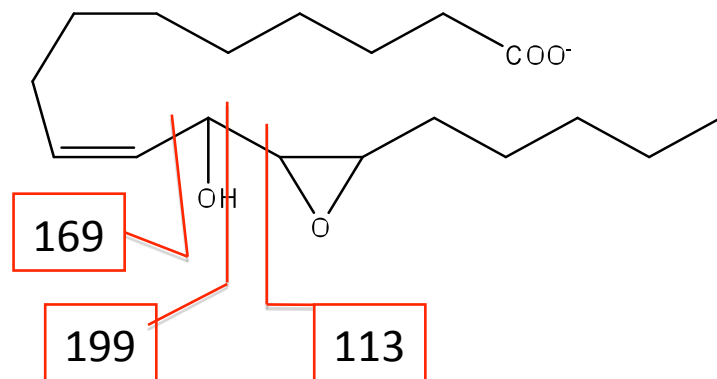

DMD # 35121

S.Figure 5) Michaelis-Menten plot for Km determinations and the parameters for goodness of fit.

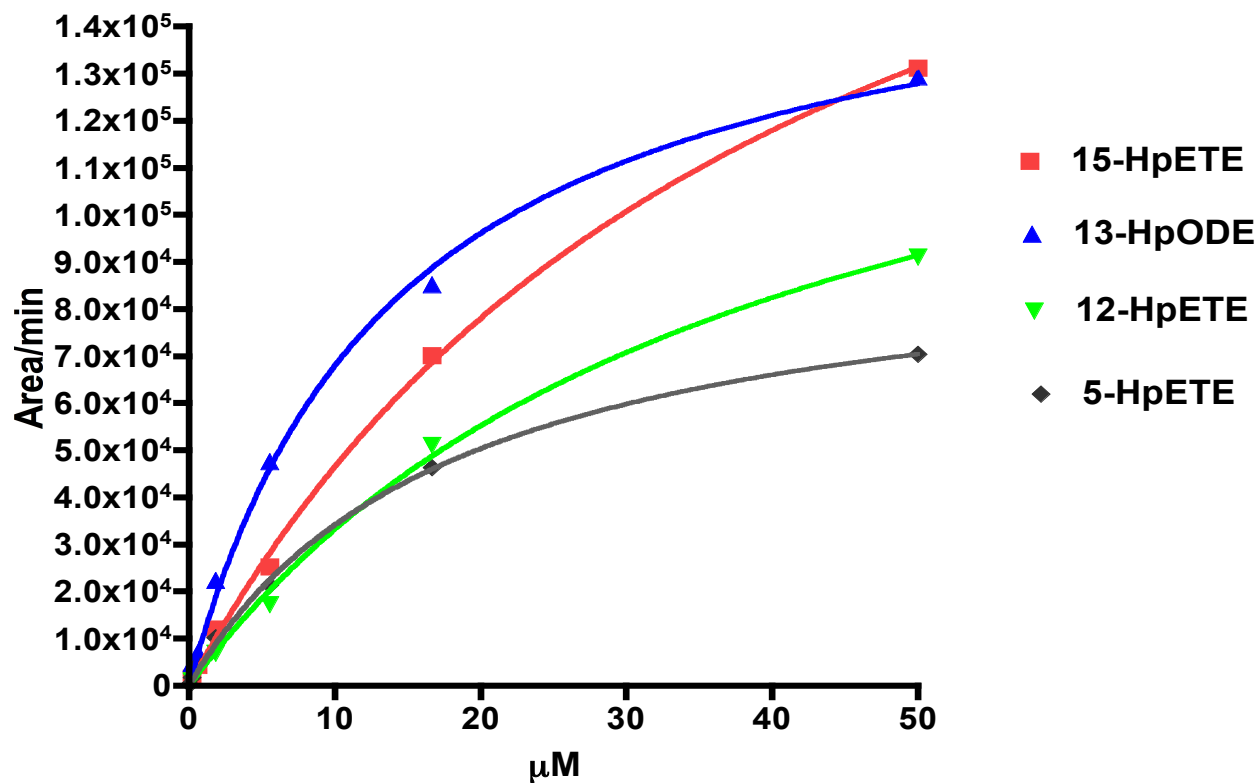

|                                 |                |                |                |                |
|---------------------------------|----------------|----------------|----------------|----------------|
| Goodness of Fit                 | 15-HpETE       | 13-HpODE       | 12-HpETE       | 5-HpETE        |
| Degrees of Freedom              | 4              | 4              | 4              | 5              |
| R squared                       | 0.9988         | 0.9972         | 0.9975         | 0.9987         |
| Absolute Sum of Squares         | 1.51E+07       | 3.37E+07       | 1.57E+07       | 5.42E+06       |
| 95% Confidence Intervals for Km | 30.35 to 53.61 | 10.04 to 18.19 | 23.63 to 54.06 | 14.69 to 21.39 |



S. Figure 6) The analysis of human CYP2S1 and PGG<sub>2</sub> incubation using mass spectrometry. Products were detected using selected ion monitoring (SIM) mode with m/z set at 349 [M-H]<sup>-</sup>. Red represents human CYP2S1 and PGG<sub>2</sub> incubation. Blue represents heated CYP2S1 and PGG<sub>2</sub> incubation. \* are products that have m/z [M-H]<sup>-</sup> 349. The m/z [M-H]<sup>-</sup> of 15-keto-PGG<sub>2</sub> and 12-oxoHT is 349 and 278 respectively. No product was detected at m/z 278 [M-H]<sup>-</sup>.

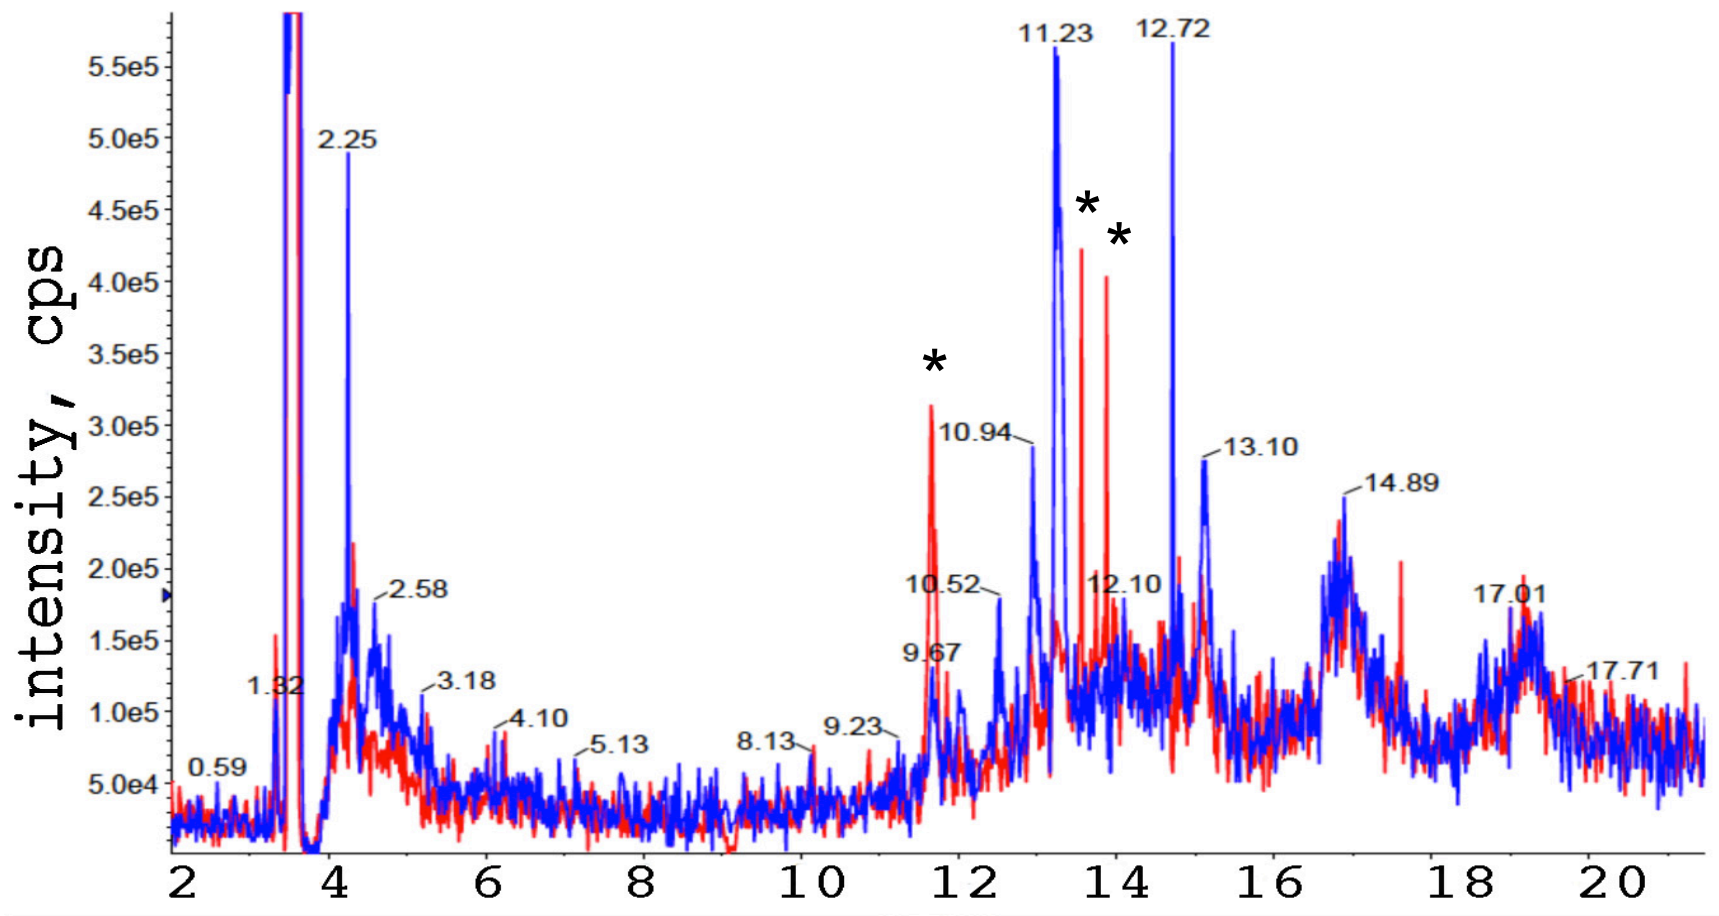

Supplement: supp_110.035121_DMD35121supplemental_material.pdf [file supp_110.035121_DMD35121supplemental_material.pdf]
